# Supplementary material for: New C15 Acetogenins from Two Species of Laurencia from the Aegean Sea
Source: MDPI journal article supplement (doi:10.3390/molecules27061866), 2022-03-13
Supplement: s1 [file s1]

# Supplementary Materials for

## New C<sub>15</sub> Acetogenins from Two Species of *Laurencia* from the Aegean Sea

Maria Harizani <sup>1</sup>, Dafni-Ioanna Diakaki <sup>1</sup>, Stamatios Perdikaris <sup>1</sup>, Vassilios Roussis <sup>1</sup> and Efstathia Ioannou <sup>1,\*</sup>

<sup>1</sup> Section of Pharmacognosy and Chemistry of Natural Products, Department of Pharmacy, School of Health Sciences, National and Kapodistrian University of Athens, Panepistimiopolis Zografou, Athens 15771, Greece; mariachariz@pharm.uoa.gr (M.H.); dafnid@pharm.uoa.gr (D.-I.D.); takiperd@hotmail.com (S.P.); roussis@pharm.uoa.gr (V.R.)

\* Correspondence: eioannou@pharm.uoa.gr; Tel.: +30-210-727-4913

### Table of Contents

|                                                                                                    |    |
|----------------------------------------------------------------------------------------------------|----|
| <b>Table S1.</b> In vitro antibacterial activity of compounds 1–3, 5–11, 13 and 15–32. ....        | 4  |
| <b>Figure S1.</b> <sup>1</sup> H NMR spectrum (CDCl <sub>3</sub> , 400 MHz) of compound 1. ....    | 5  |
| <b>Figure S2.</b> <sup>1</sup> H NMR spectrum (CDCl <sub>3</sub> , 400 MHz) of compound 2. ....    | 5  |
| <b>Figure S3.</b> <sup>13</sup> C NMR spectrum (CDCl <sub>3</sub> , 50.3 MHz) of compound 2. ....  | 6  |
| <b>Figure S4.</b> COSY spectrum (CDCl <sub>3</sub> , 400 MHz) of compound 2. ....                  | 6  |
| <b>Figure S5.</b> HSQC spectrum (CDCl <sub>3</sub> , 400 MHz) of compound 2. ....                  | 7  |
| <b>Figure S6.</b> HMBC spectrum (CDCl <sub>3</sub> , 400 MHz) of compound 2. ....                  | 7  |
| <b>Figure S7.</b> NOESY spectrum (CDCl <sub>3</sub> , 400 MHz) of compound 2. ....                 | 8  |
| <b>Figure S8.</b> HR-APCIMS of compound 2. ....                                                    | 8  |
| <b>Figure S9.</b> <sup>1</sup> H NMR spectrum (CDCl <sub>3</sub> , 400 MHz) of compound 3. ....    | 9  |
| <b>Figure S10.</b> <sup>13</sup> C NMR spectrum (CDCl <sub>3</sub> , 50.3 MHz) of compound 3. .... | 9  |
| <b>Figure S11.</b> COSY spectrum (CDCl <sub>3</sub> , 400 MHz) of compound 3. ....                 | 10 |
| <b>Figure S12.</b> HSQC spectrum (CDCl <sub>3</sub> , 400 MHz) of compound 3. ....                 | 10 |
| <b>Figure S13.</b> HMBC spectrum (CDCl <sub>3</sub> , 400 MHz) of compound 3. ....                 | 11 |
| <b>Figure S14.</b> 1D-NOE spectra (CDCl <sub>3</sub> , 400 MHz) of compound 3. ....                | 11 |
| <b>Figure S15.</b> HR-APCIMS of compound 3. ....                                                   | 12 |
| <b>Figure S16.</b> <sup>1</sup> H NMR spectrum (CDCl <sub>3</sub> , 400 MHz) of compound 4. ....   | 12 |
| <b>Figure S17.</b> <sup>13</sup> C NMR spectrum (CDCl <sub>3</sub> , 50.3 MHz) of compound 4. .... | 13 |
| <b>Figure S18.</b> COSY spectrum (CDCl <sub>3</sub> , 400 MHz) of compound 4. ....                 | 13 |
| <b>Figure S19.</b> HSQC spectrum (CDCl <sub>3</sub> , 400 MHz) of compound 4. ....                 | 14 |
| <b>Figure S20.</b> HMBC spectrum (CDCl <sub>3</sub> , 400 MHz) of compound 4. ....                 | 14 |
| <b>Figure S21.</b> HR-APCIMS of compound 4. ....                                                   | 15 |
| <b>Figure S22.</b> <sup>1</sup> H NMR spectrum (CDCl <sub>3</sub> , 400 MHz) of compound 5. ....   | 15 |
| <b>Figure S23.</b> <sup>1</sup> H NMR spectrum (CDCl <sub>3</sub> , 400 MHz) of compound 6. ....   | 16 |
| <b>Figure S24.</b> <sup>1</sup> H NMR spectrum (CDCl <sub>3</sub> , 400 MHz) of compound 7. ....   | 16 |
| <b>Figure S25.</b> <sup>1</sup> H NMR spectrum (CDCl <sub>3</sub> , 400 MHz) of compound 8. ....   | 17 |

|                                                                                                                                         |    |
|-----------------------------------------------------------------------------------------------------------------------------------------|----|
| <b>Figure S26.</b> <sup>1</sup> H NMR spectrum (CDCl <sub>3</sub> , 400 MHz) of compound <b>9</b> .....                                 | 17 |
| <b>Figure S27.</b> <sup>1</sup> H NMR spectrum (CDCl <sub>3</sub> , 400 MHz) of compound <b>10</b> .....                                | 18 |
| <b>Figure S28.</b> <sup>1</sup> H NMR spectrum (CDCl <sub>3</sub> , 400 MHz) of compound <b>11</b> .....                                | 18 |
| <b>Figure S29.</b> <sup>13</sup> C NMR spectrum (CDCl <sub>3</sub> , 50.3 MHz) of compound <b>11</b> .....                              | 19 |
| <b>Figure S30.</b> COSY spectrum (CDCl <sub>3</sub> , 400 MHz) of compound <b>11</b> .....                                              | 19 |
| <b>Figure S31.</b> HSQC spectrum (CDCl <sub>3</sub> , 400 MHz) of compound <b>11</b> .....                                              | 20 |
| <b>Figure S32.</b> HMBC spectrum (CDCl <sub>3</sub> , 600 MHz) of compound <b>11</b> .....                                              | 20 |
| <b>Figure S33.</b> NOESY spectrum (CDCl <sub>3</sub> , 600 MHz) of compound <b>11</b> .....                                             | 21 |
| <b>Figure S34.</b> HR-APCIMS of compound <b>11</b> .....                                                                                | 21 |
| <b>Figure S35.</b> <sup>1</sup> H NMR spectrum (CDCl <sub>3</sub> , 400 MHz) of compound <b>12</b> .....                                | 22 |
| <b>Figure S36.</b> <sup>13</sup> C NMR spectrum (CDCl <sub>3</sub> , 50.3 MHz) of compound <b>12</b> .....                              | 22 |
| <b>Figure S37.</b> COSY spectrum (CDCl <sub>3</sub> , 400 MHz) of compound <b>12</b> .....                                              | 23 |
| <b>Figure S38.</b> HSQC spectrum (CDCl <sub>3</sub> , 400 MHz) of compound <b>12</b> .....                                              | 23 |
| <b>Figure S39.</b> HMBC spectrum (CDCl <sub>3</sub> , 700 MHz) of compound <b>12</b> (partial decomposition was already observed).....  | 24 |
| <b>Figure S40.</b> NOESY spectrum (CDCl <sub>3</sub> , 700 MHz) of compound <b>12</b> (partial decomposition was already observed)..... | 24 |
| <b>Figure S41.</b> HR-APCIMS of compound <b>12</b> .....                                                                                | 25 |
| <b>Figure S42.</b> <sup>1</sup> H NMR spectrum (CDCl <sub>3</sub> , 400 MHz) of compound <b>13</b> .....                                | 25 |
| <b>Figure S43.</b> <sup>1</sup> H NMR spectrum (CDCl <sub>3</sub> , 400 MHz) of compound <b>14</b> .....                                | 26 |
| <b>Figure S44.</b> <sup>1</sup> H NMR spectrum (CDCl <sub>3</sub> , 400 MHz) of compound <b>15</b> .....                                | 26 |
| <b>Figure S45.</b> <sup>1</sup> H NMR spectrum (CDCl <sub>3</sub> , 400 MHz) of compound <b>16</b> .....                                | 27 |
| <b>Figure S46.</b> <sup>1</sup> H NMR spectrum (CDCl <sub>3</sub> , 400 MHz) of compound <b>17</b> .....                                | 27 |
| <b>Figure S47.</b> <sup>13</sup> C NMR spectrum (CDCl <sub>3</sub> , 50.3 MHz) of compound <b>17</b> .....                              | 28 |
| <b>Figure S48.</b> COSY spectrum (CDCl <sub>3</sub> , 400 MHz) of compound <b>17</b> .....                                              | 28 |
| <b>Figure S49.</b> HSQC spectrum (CDCl <sub>3</sub> , 400 MHz) of compound <b>17</b> .....                                              | 29 |
| <b>Figure S50.</b> HMBC spectrum (CDCl <sub>3</sub> , 400 MHz) of compound <b>17</b> .....                                              | 29 |
| <b>Figure S51.</b> NOESY spectrum (CDCl <sub>3</sub> , 400 MHz) of compound <b>17</b> .....                                             | 30 |
| <b>Figure S52.</b> HR-APCIMS of compound <b>17</b> .....                                                                                | 30 |
| <b>Figure S53.</b> <sup>1</sup> H NMR spectrum (C <sub>6</sub> D <sub>6</sub> , 400 MHz) of compound <b>17</b> .....                    | 31 |
| <b>Figure S54.</b> COSY spectrum (C <sub>6</sub> D <sub>6</sub> , 400 MHz) of compound <b>17</b> .....                                  | 31 |
| <b>Figure S55.</b> 1D-NOE spectra (C <sub>6</sub> D <sub>6</sub> , 400 MHz) of compound <b>17</b> .....                                 | 32 |
| <b>Figure S56.</b> <sup>1</sup> H NMR spectrum (CDCl <sub>3</sub> , 400 MHz) of compound <b>18</b> .....                                | 32 |
| <b>Figure S57.</b> <sup>1</sup> H NMR spectrum (CDCl <sub>3</sub> , 400 MHz) of compound <b>19</b> .....                                | 33 |
| <b>Figure S58.</b> <sup>1</sup> H NMR spectrum (CDCl <sub>3</sub> , 400 MHz) of compound <b>20</b> .....                                | 33 |
| <b>Figure S59.</b> <sup>1</sup> H NMR spectrum (CDCl <sub>3</sub> , 400 MHz) of compound <b>21</b> .....                                | 34 |
| <b>Figure S60.</b> <sup>1</sup> H NMR spectrum (CDCl <sub>3</sub> , 400 MHz) of compound <b>22</b> .....                                | 34 |
| <b>Figure S61.</b> <sup>1</sup> H NMR spectrum (CDCl <sub>3</sub> , 400 MHz) of compound <b>23</b> .....                                | 35 |
| <b>Figure S62.</b> <sup>1</sup> H NMR spectrum (CDCl <sub>3</sub> , 400 MHz) of compound <b>24</b> .....                                | 35 |
| <b>Figure S63.</b> <sup>1</sup> H NMR spectrum (CDCl <sub>3</sub> , 400 MHz) of compound <b>25</b> .....                                | 36 |
| <b>Figure S64.</b> <sup>1</sup> H NMR spectrum (CDCl <sub>3</sub> , 400 MHz) of compound <b>26</b> .....                                | 36 |

|                                                                                                       |    |
|-------------------------------------------------------------------------------------------------------|----|
| <b>Figure S65.</b> $^1\text{H}$ NMR spectrum ( $\text{CDCl}_3$ , 400 MHz) of compound <b>27</b> ..... | 37 |
| <b>Figure S66.</b> $^1\text{H}$ NMR spectrum ( $\text{CDCl}_3$ , 400 MHz) of compound <b>28</b> ..... | 37 |
| <b>Figure S67.</b> $^1\text{H}$ NMR spectrum ( $\text{CDCl}_3$ , 400 MHz) of compound <b>29</b> ..... | 38 |
| <b>Figure S68.</b> $^1\text{H}$ NMR spectrum ( $\text{CDCl}_3$ , 400 MHz) of compound <b>30</b> ..... | 38 |
| <b>Figure S69.</b> $^1\text{H}$ NMR spectrum ( $\text{CDCl}_3$ , 400 MHz) of compound <b>31</b> ..... | 39 |
| <b>Figure S70.</b> $^1\text{H}$ NMR spectrum ( $\text{CDCl}_3$ , 400 MHz) of compound <b>32</b> ..... | 39 |

**Table S1.** In vitro antibacterial activity of compounds 1–3, 5–11, 13 and 15–32.

| Compound                                              | MIC ( $\mu\text{g/mL}$ )      |                             |
|-------------------------------------------------------|-------------------------------|-----------------------------|
|                                                       | <i>S. aureus</i> (ATCC-25923) | <i>E. coli</i> (NCTC-10418) |
| sagonenyne (1)                                        | not active <sup>1</sup>       | not active <sup>1</sup>     |
| 10-acetyl-sagonenyne (2)                              | not active <sup>1</sup>       | not active <sup>1</sup>     |
| <i>cis</i> -sagonenyne (3)                            | not active <sup>1</sup>       | not active <sup>1</sup>     |
| compound 5                                            | not active <sup>1</sup>       | not active <sup>1</sup>     |
| rogiloxepane C (6)                                    | not active <sup>1</sup>       | not active <sup>1</sup>     |
| rogilenyne B (7)                                      | 128                           | not active <sup>1</sup>     |
| <i>trans</i> -pinnatifidenyne (8)                     | not active <sup>1</sup>       | not active <sup>1</sup>     |
| (3 <i>E</i> )-laurenyne (9)                           | not active <sup>1</sup>       | not active <sup>1</sup>     |
| marilzallene B (10)                                   | not active <sup>1</sup>       | not active <sup>1</sup>     |
| tinosallene A (11)                                    | not active <sup>1</sup>       | not active <sup>1</sup>     |
| (3 <i>E</i> ,6 <i>R</i> ,7 <i>R</i> )-obtusenyne (13) | not active <sup>1</sup>       | not active <sup>1</sup>     |
| 10-bromo-obtusallene I (15)                           | not active <sup>1</sup>       | not active <sup>1</sup>     |
| obtusallene VII (16)                                  | not active <sup>1</sup>       | not active <sup>1</sup>     |
| obtusallene XI (17)                                   | not active <sup>1</sup>       | not active <sup>1</sup>     |
| obtusallene IV (18)                                   | not active <sup>1</sup>       | not active <sup>1</sup>     |
| obtusallene VI (19)                                   | not active <sup>1</sup>       | not active <sup>1</sup>     |
| obtusallene V (20)                                    | not active <sup>1</sup>       | not active <sup>1</sup>     |
| chondrioallene (21)                                   | not active <sup>1</sup>       | not active <sup>1</sup>     |
| compound 22                                           | not active <sup>1</sup>       | not active <sup>1</sup>     |
| compound 23                                           | not active <sup>1</sup>       | not active <sup>1</sup>     |
| <i>iso</i> -laurenisol (24)                           | 16                            | not active <sup>1</sup>     |
| bromolaurenisol (25)                                  | 4                             | not active <sup>1</sup>     |
| $\alpha$ -snyderol (26)                               | not active <sup>1</sup>       | not active <sup>1</sup>     |
| obtusanol (27)                                        | not active <sup>1</sup>       | not active <sup>1</sup>     |
| perforenol (28)                                       | not active <sup>1</sup>       | not active <sup>1</sup>     |
| compound 29                                           | not active <sup>1</sup>       | not active <sup>1</sup>     |
| <i>trans</i> -nerolidol (30)                          | not active <sup>1</sup>       | not active <sup>1</sup>     |
| isopinnatol B (31)                                    | not active <sup>1</sup>       | not active <sup>1</sup>     |
| deoxyparguerol (32)                                   | not active <sup>1</sup>       | not active <sup>1</sup>     |
| vancomycin                                            | 1                             | not tested                  |
| chloramphenicol                                       | not tested                    | 4                           |

<sup>1</sup> At a concentration of 128  $\mu\text{g/mL}$ .

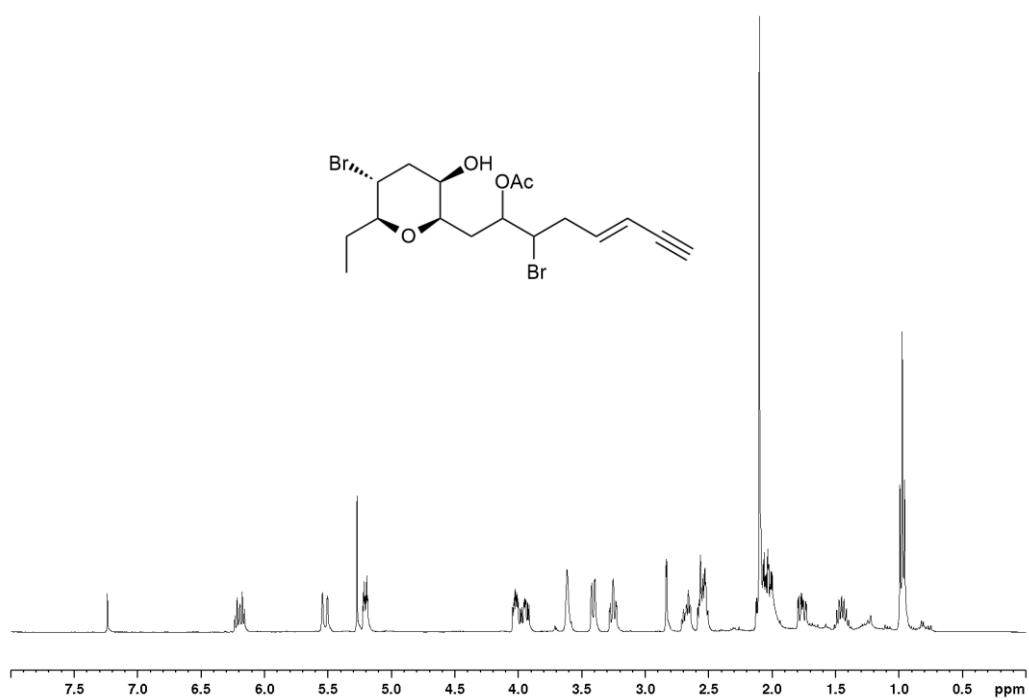

**Figure S1.** <sup>1</sup>H NMR spectrum (CDCl<sub>3</sub>, 400 MHz) of compound 1.

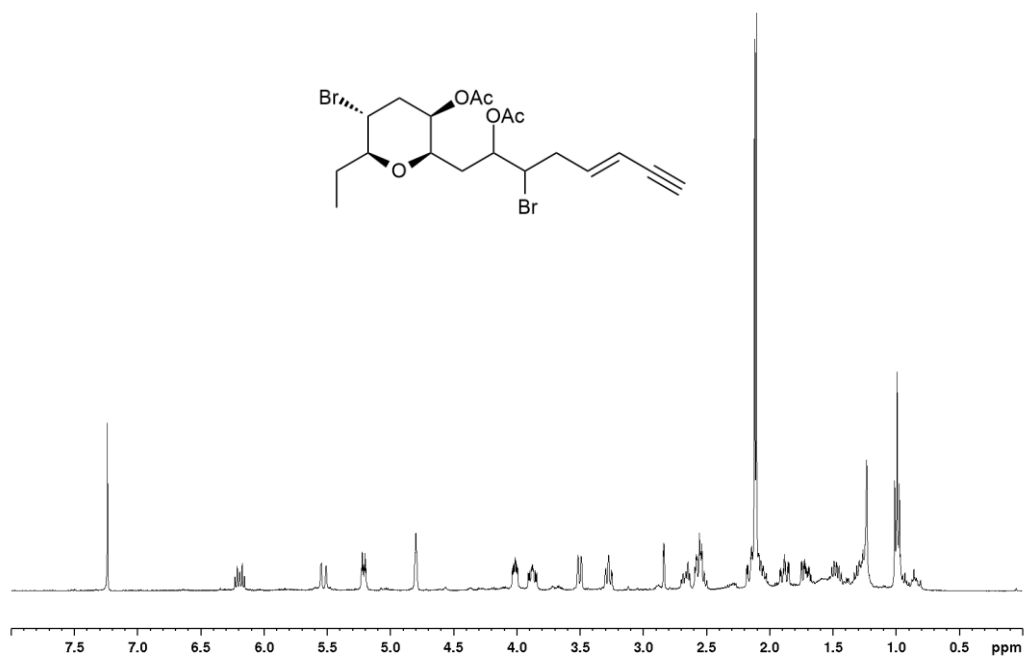

**Figure S2.** <sup>1</sup>H NMR spectrum (CDCl<sub>3</sub>, 400 MHz) of compound 2.

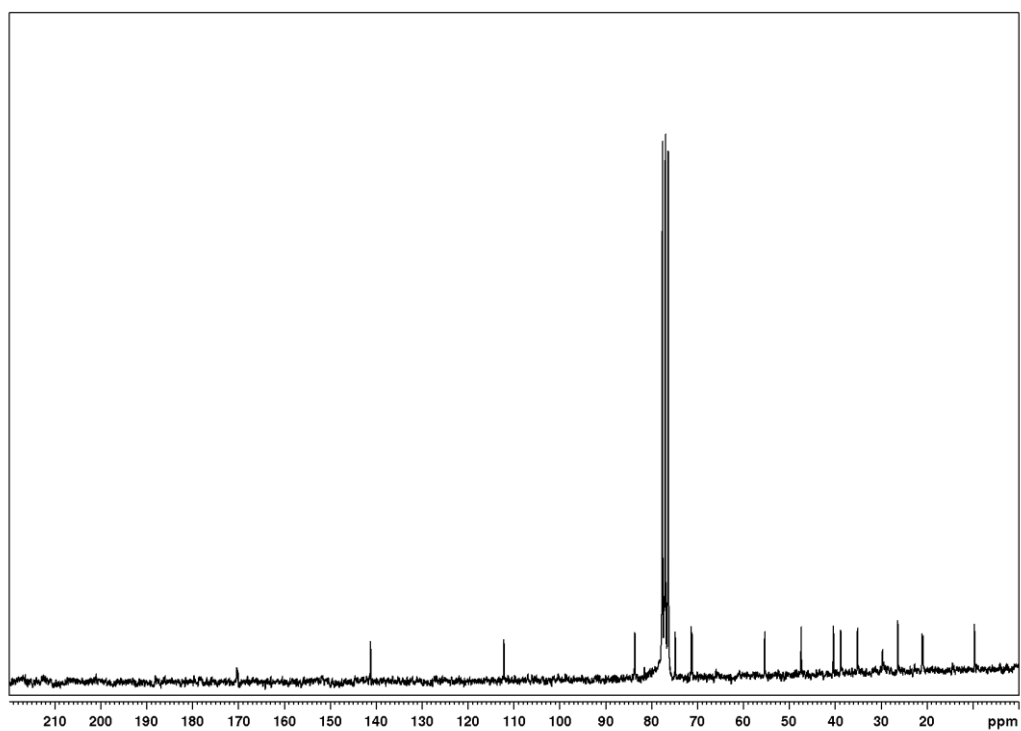

Figure S3.  $^{13}\text{C}$  NMR spectrum ( $\text{CDCl}_3$ , 50.3 MHz) of compound **2**.

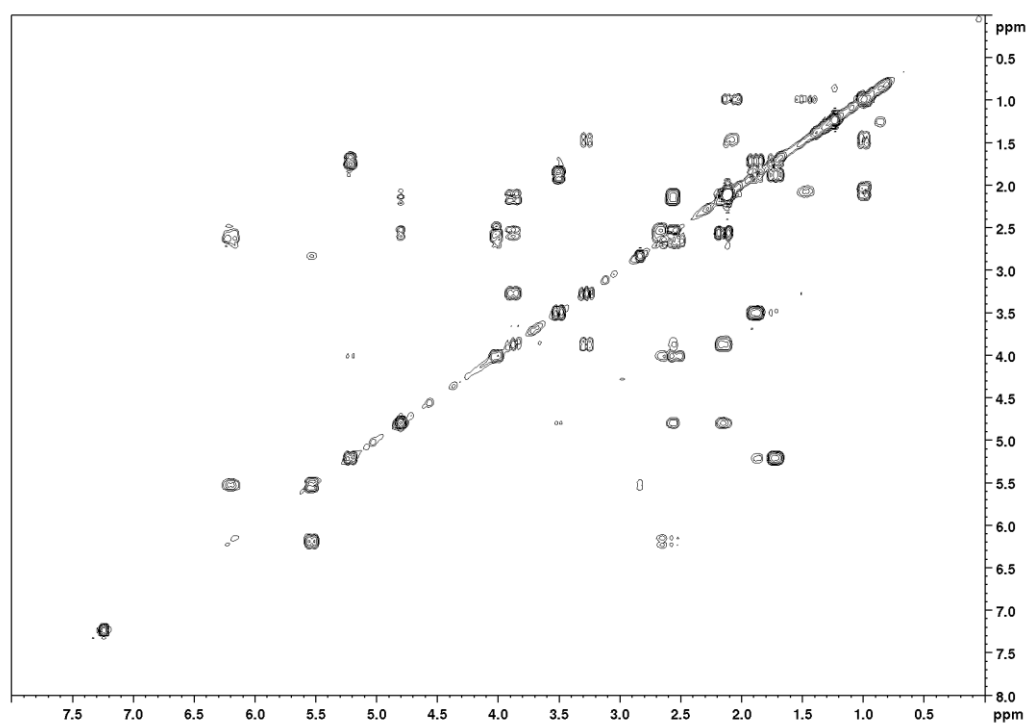

Figure S4. COSY spectrum ( $\text{CDCl}_3$ , 400 MHz) of compound **2**.

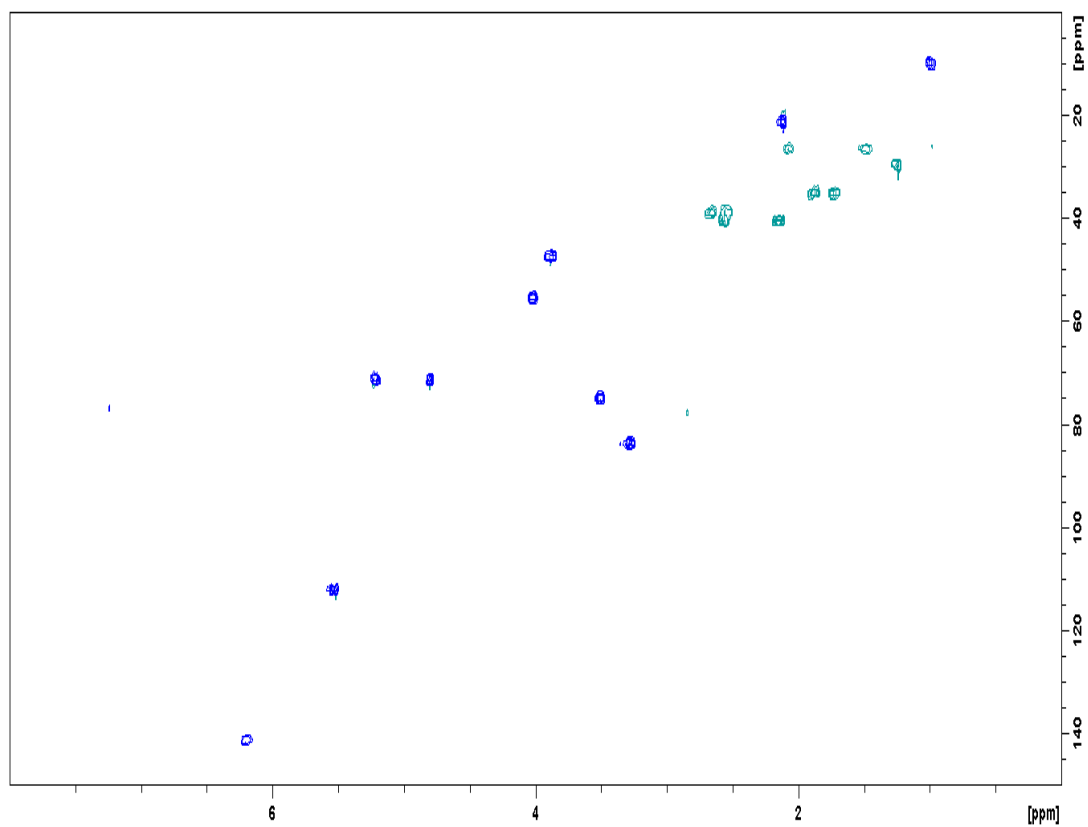

**Figure S5.** HSQC spectrum ( $\text{CDCl}_3$ , 400 MHz) of compound **2**.

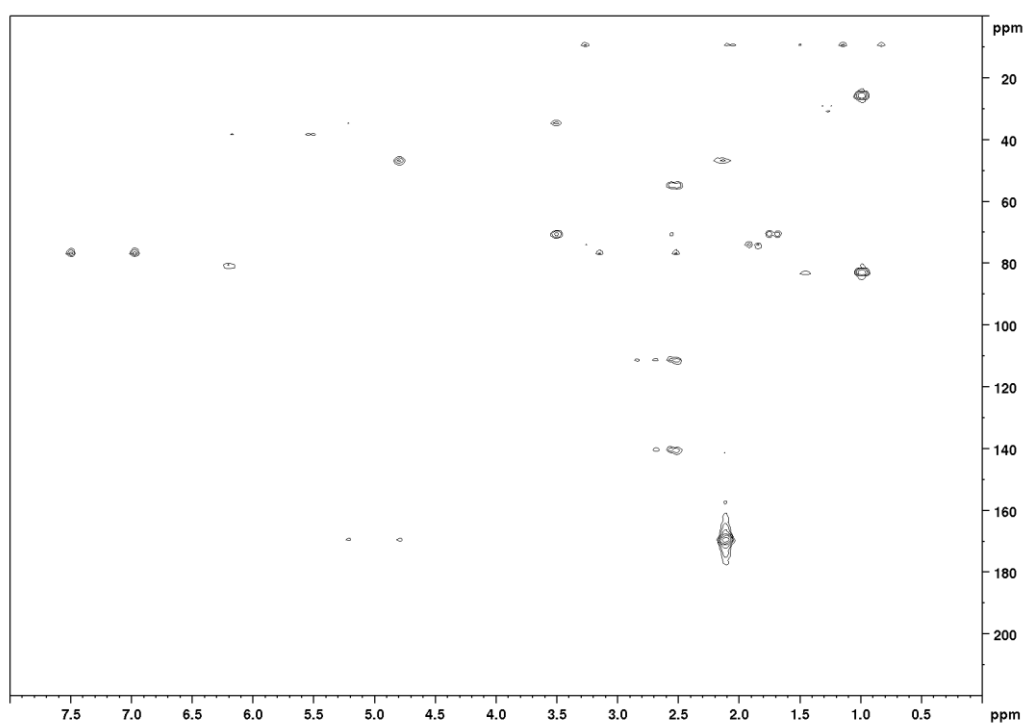

**Figure S6.** HMBC spectrum ( $\text{CDCl}_3$ , 400 MHz) of compound **2**.

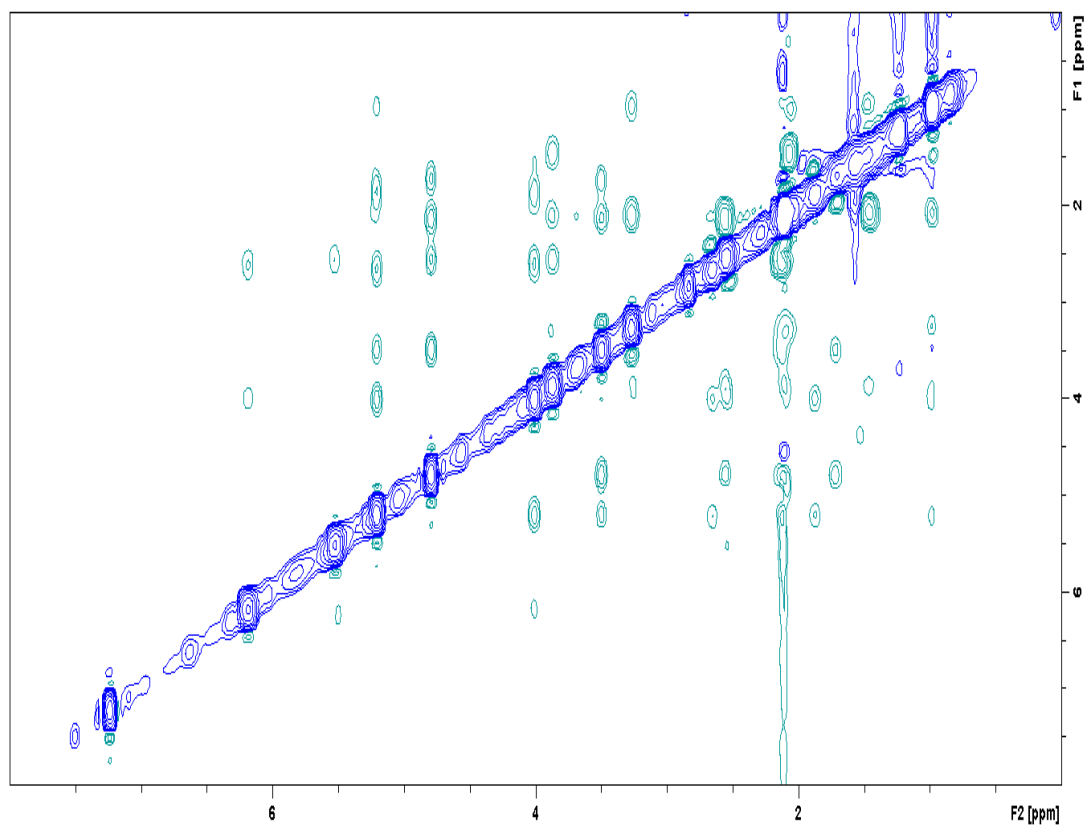

**Figure S7.** NOESY spectrum ( $\text{CDCl}_3$ , 400 MHz) of compound **2**.

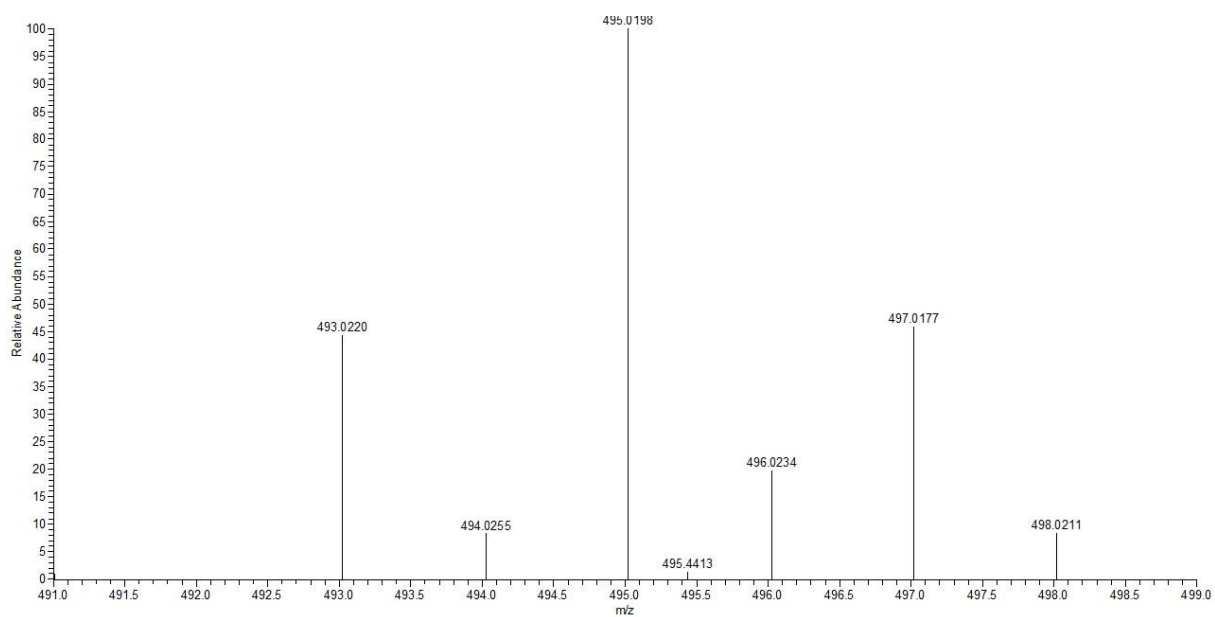

**Figure S8.** HR-APCIMS of compound **2**.



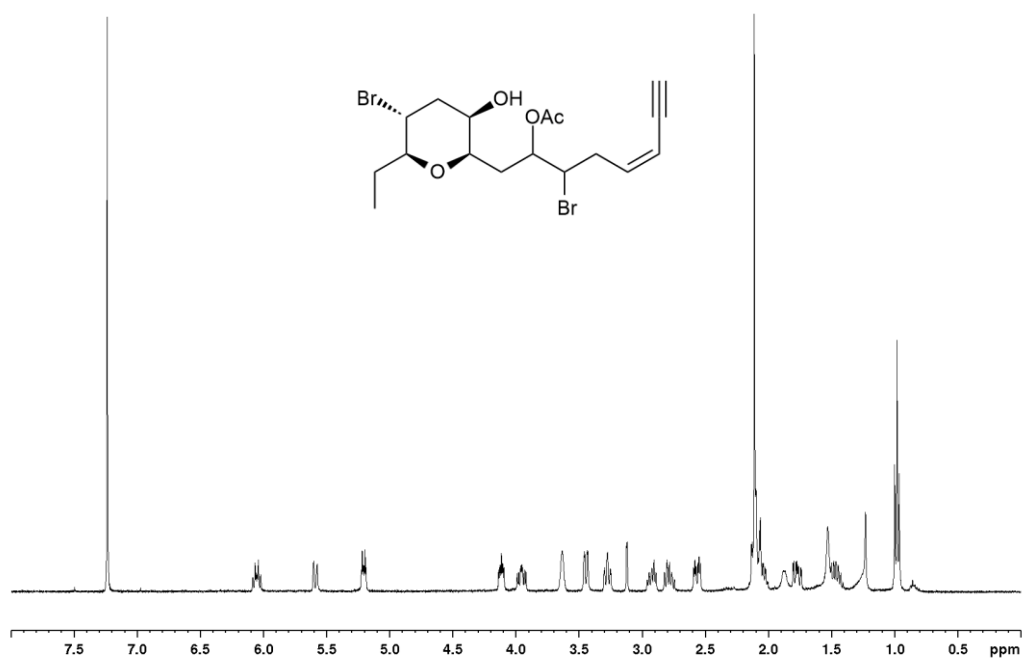

**Figure S9.** <sup>1</sup>H NMR spectrum (CDCl<sub>3</sub>, 400 MHz) of compound 3.

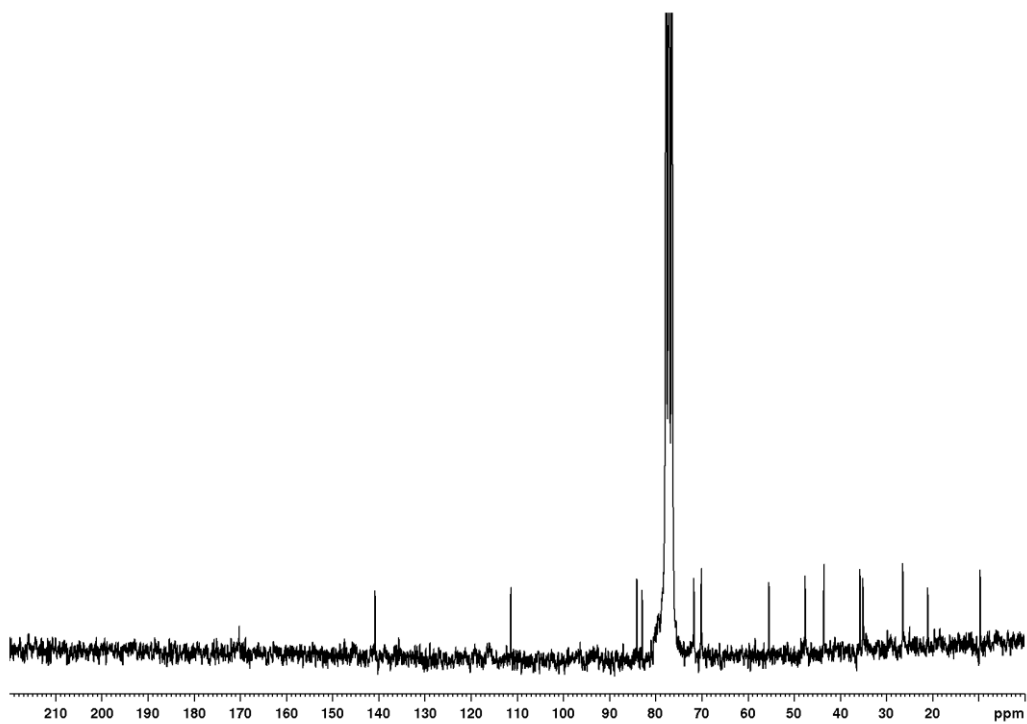

**Figure S10.** <sup>13</sup>C NMR spectrum (CDCl<sub>3</sub>, 50.3 MHz) of compound 3.

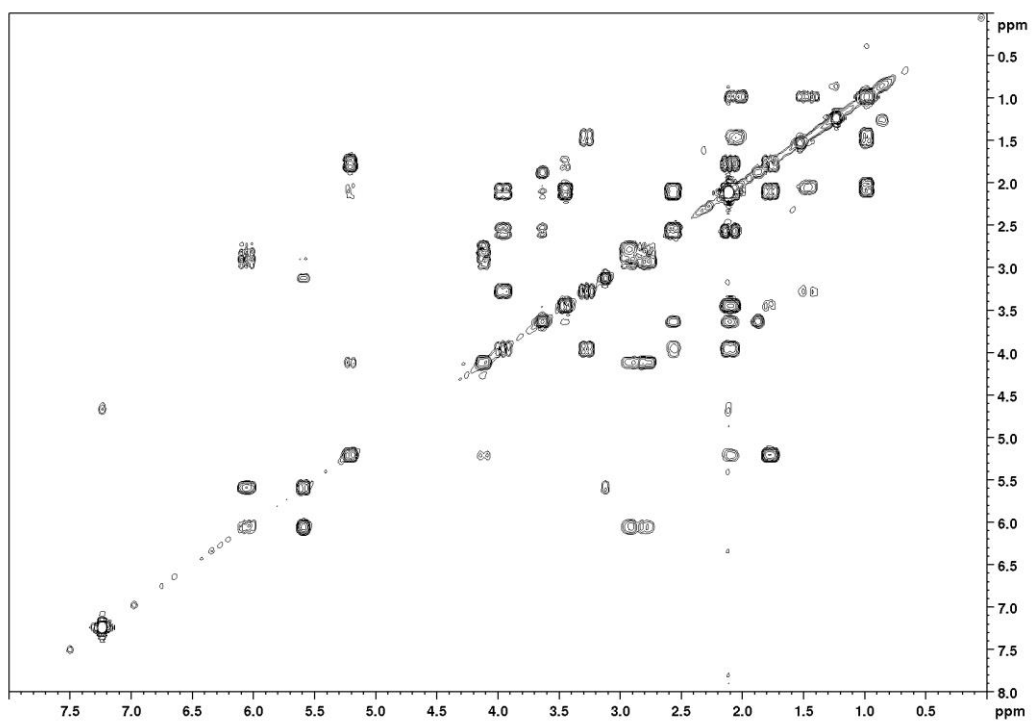

**Figure S11.** COSY spectrum (CDCl<sub>3</sub>, 400 MHz) of compound 3.

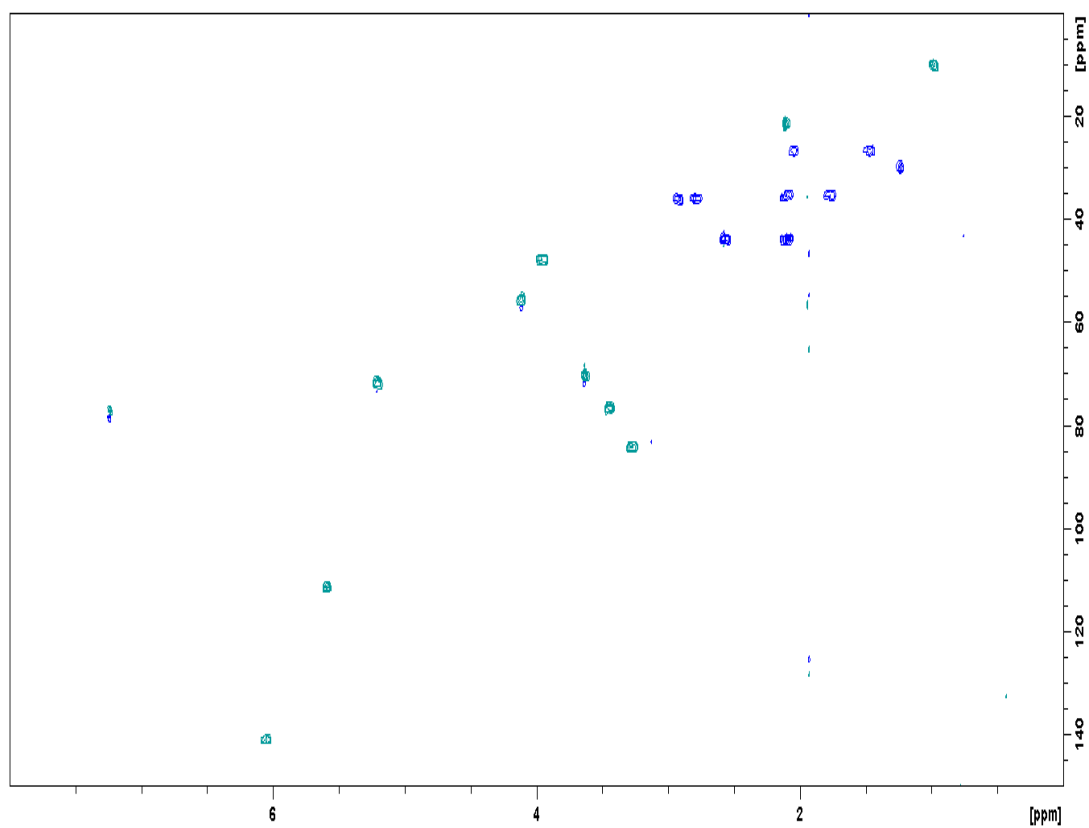

**Figure S12.** HSQC spectrum (CDCl<sub>3</sub>, 400 MHz) of compound 3.

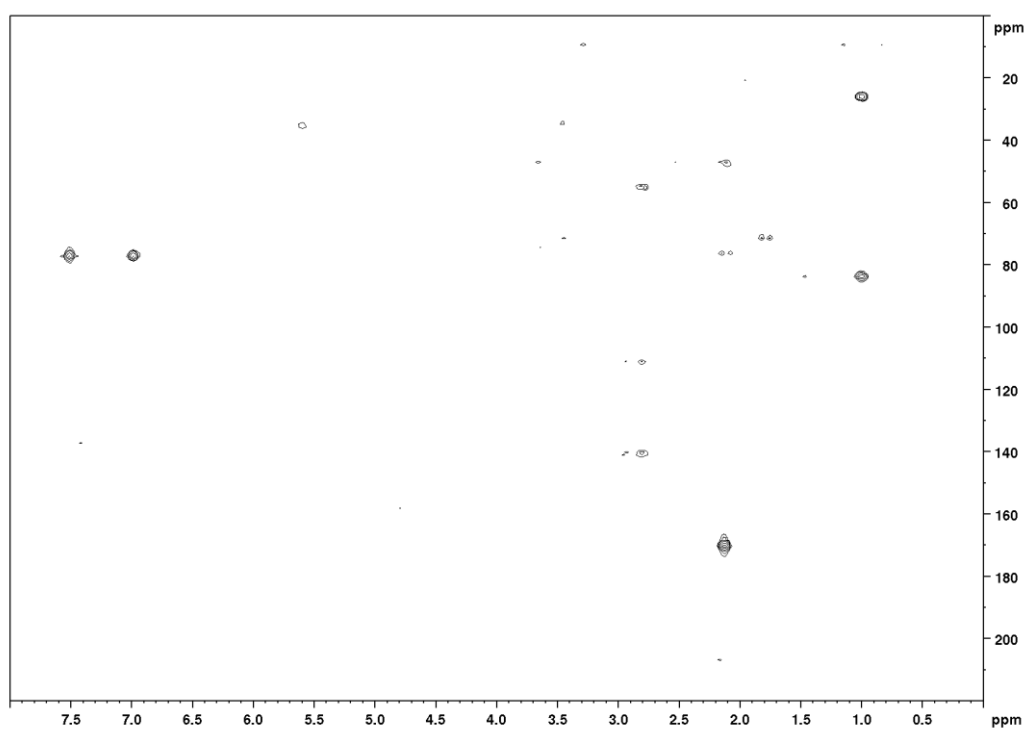

**Figure S13.** HMBC spectrum ( $\text{CDCl}_3$ , 400 MHz) of compound **3**.

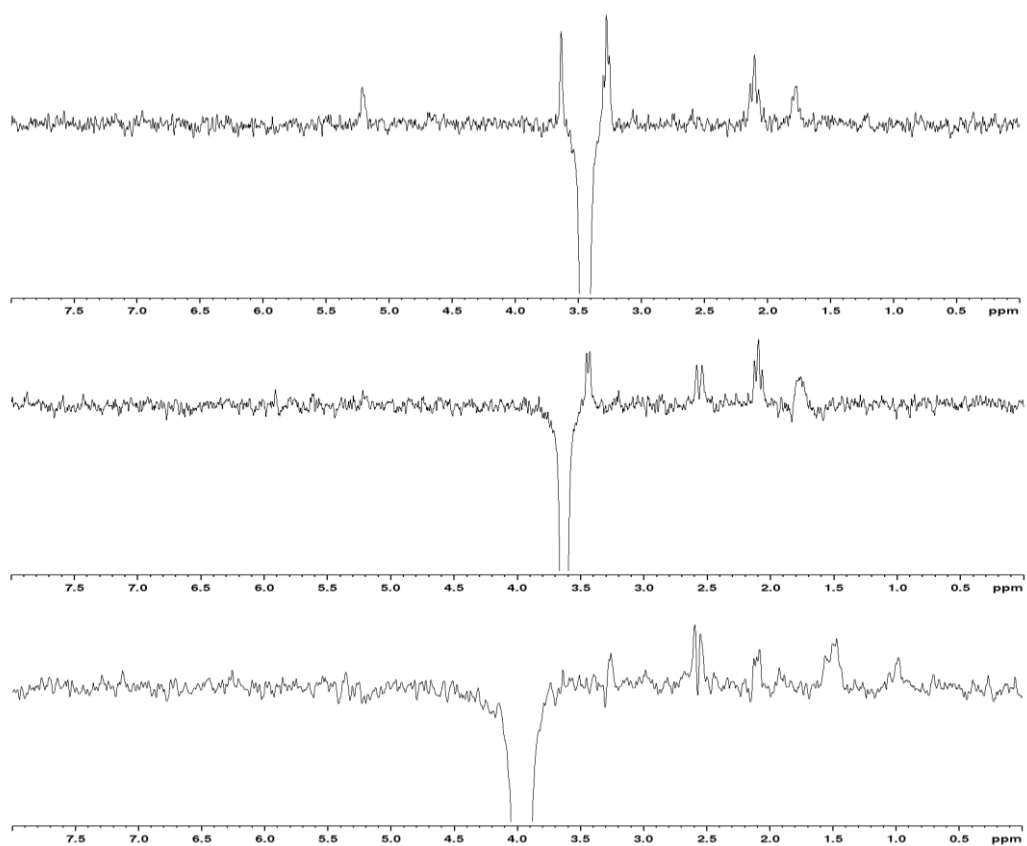

**Figure S14.** 1D-NOE spectra ( $\text{CDCl}_3$ , 400 MHz) of compound **3**.

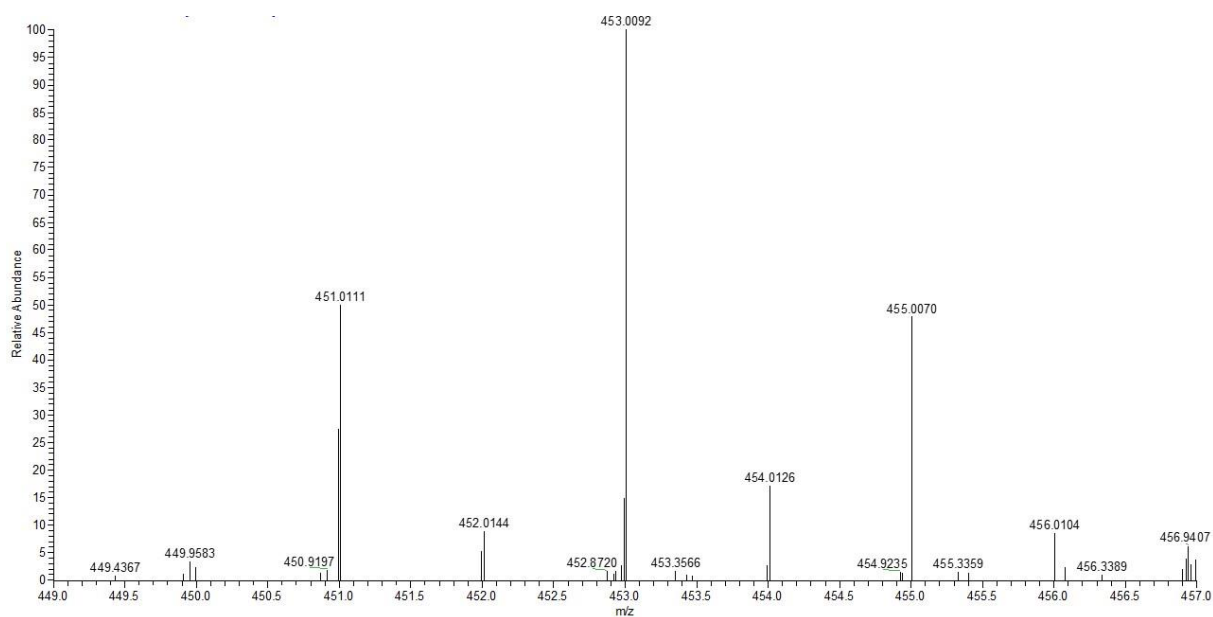

**Figure S15.** HR-APCIMS of compound **3**.

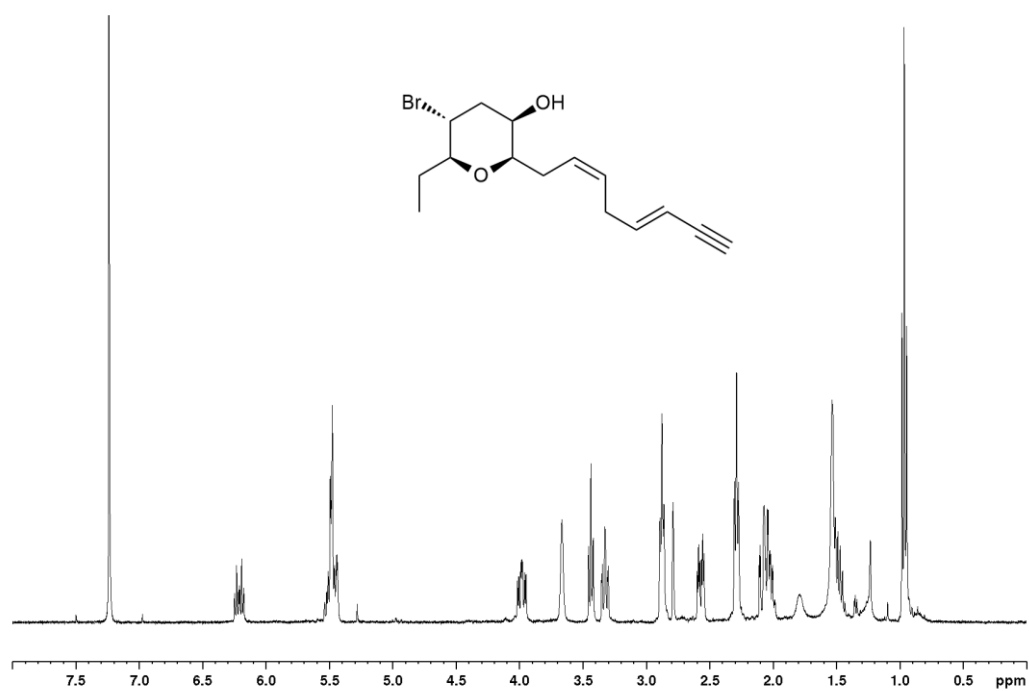

**Figure S16.**  $^1\text{H}$  NMR spectrum ( $\text{CDCl}_3$ , 400 MHz) of compound **4**.

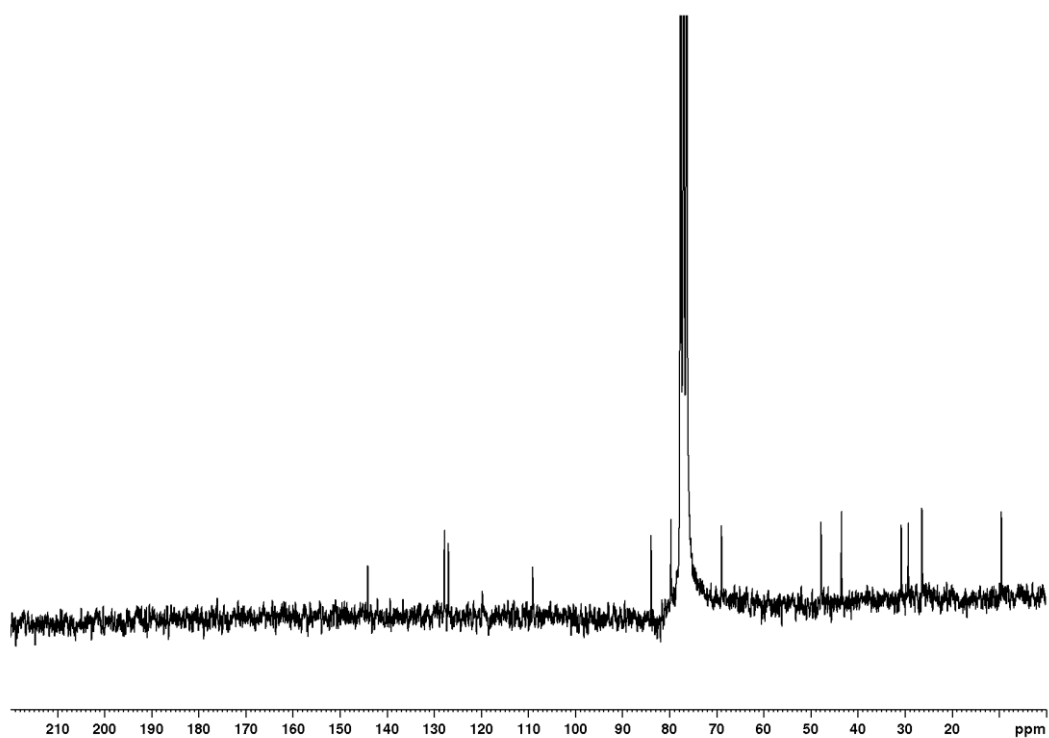

**Figure S17.**  $^{13}\text{C}$  NMR spectrum ( $\text{CDCl}_3$ , 50.3 MHz) of compound **4**.

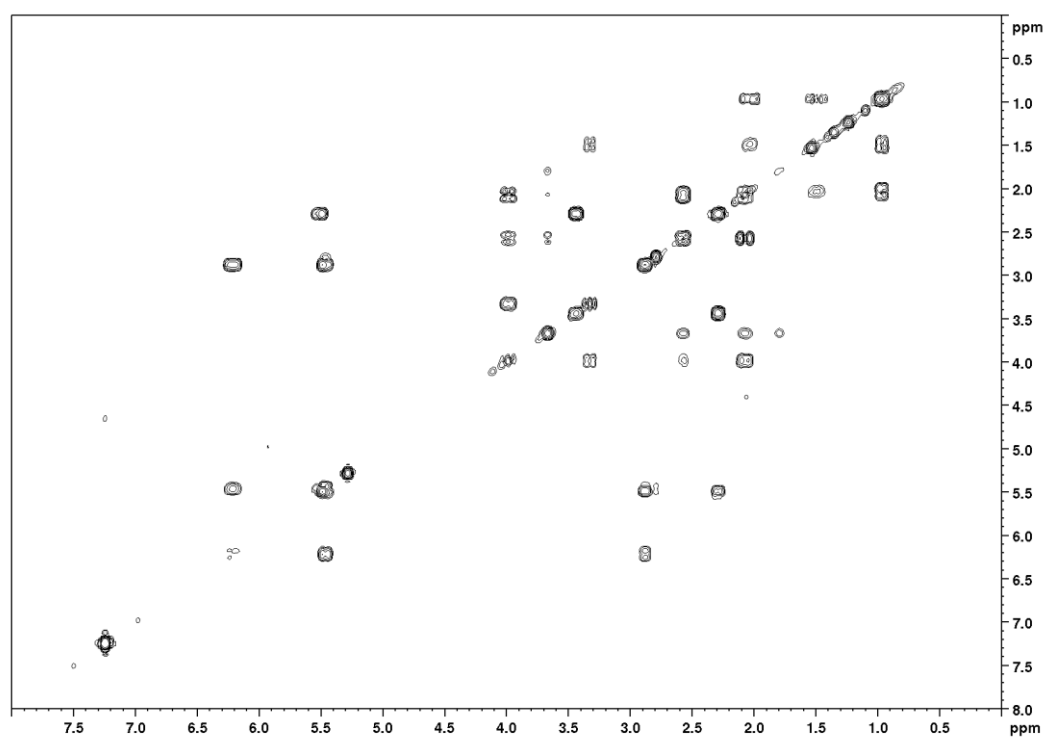

**Figure S18.** COSY spectrum ( $\text{CDCl}_3$ , 400 MHz) of compound **4**.

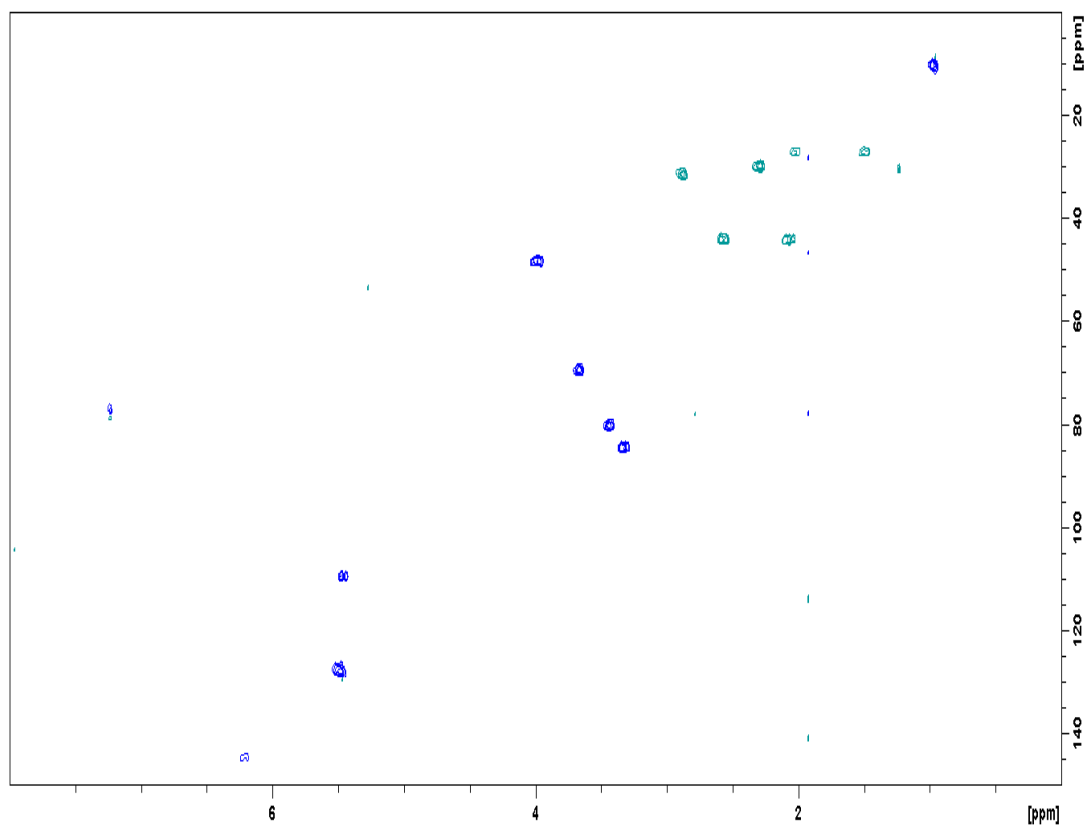

**Figure S19.** HSQC spectrum ( $\text{CDCl}_3$ , 400 MHz) of compound **4**.

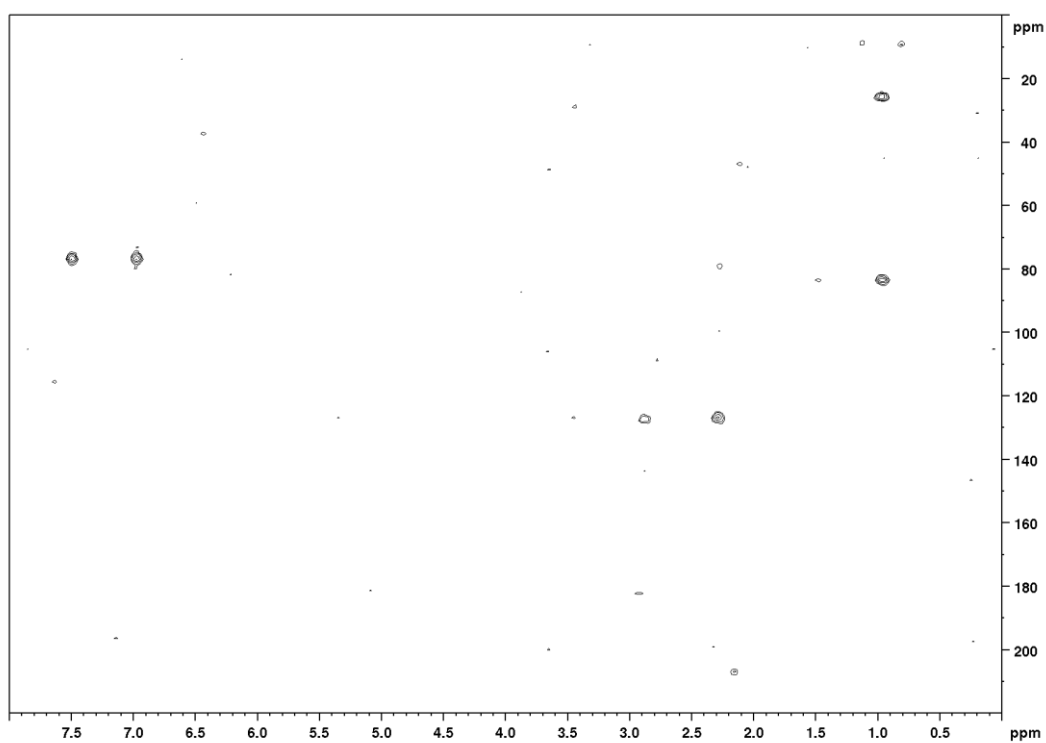

**Figure S20.** HMBC spectrum ( $\text{CDCl}_3$ , 400 MHz) of compound **4**.

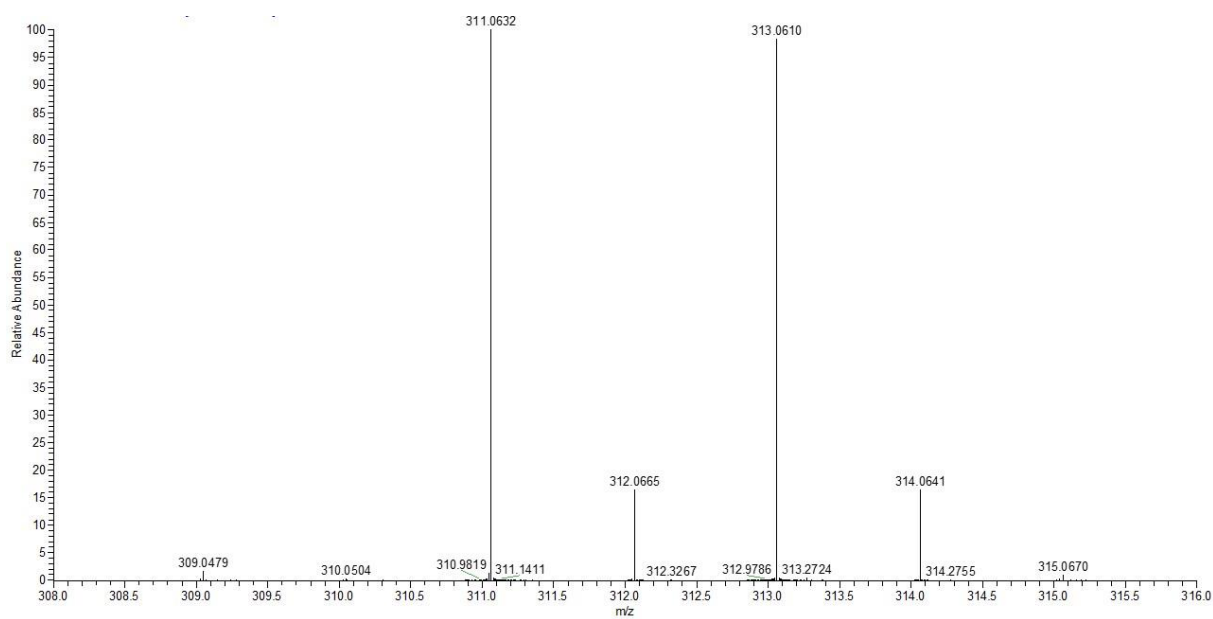

**Figure S21.** HR-APCIMS of compound **4**.

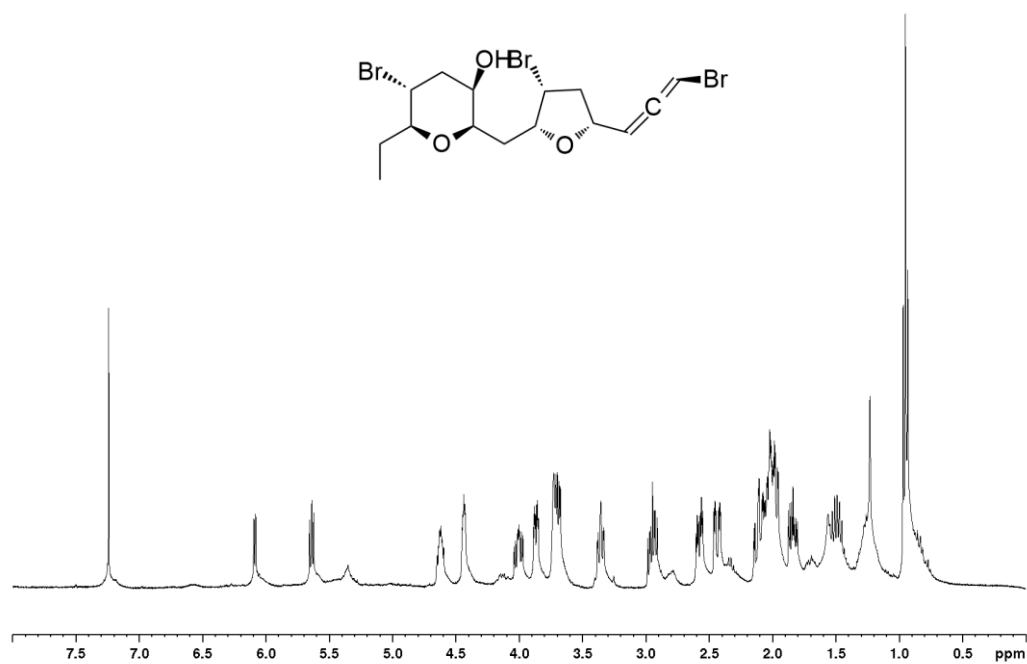

**Figure S22.**  $^1\text{H}$  NMR spectrum ( $\text{CDCl}_3$ , 400 MHz) of compound **5**.

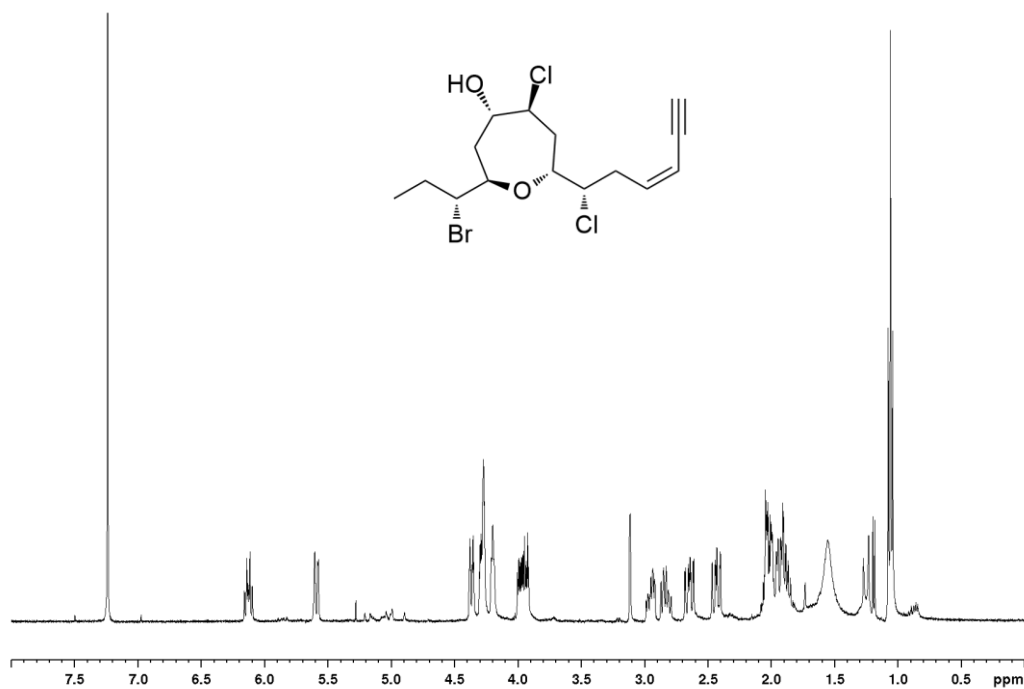

**Figure S23.** <sup>1</sup>H NMR spectrum (CDCl<sub>3</sub>, 400 MHz) of compound 6.

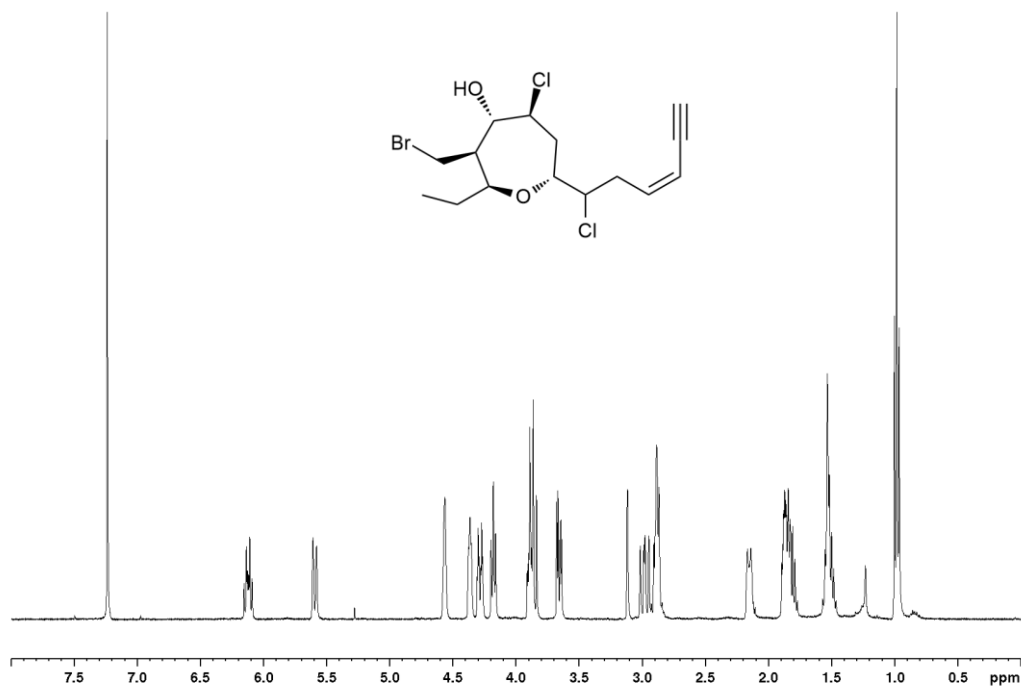

**Figure S24.** <sup>1</sup>H NMR spectrum (CDCl<sub>3</sub>, 400 MHz) of compound 7.



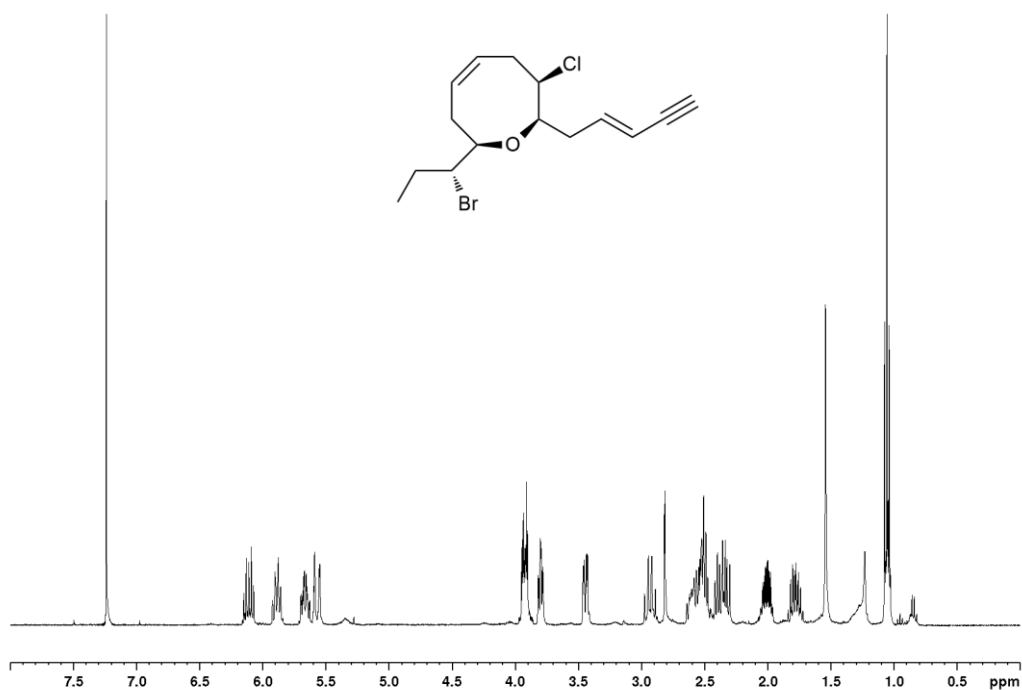

**Figure S25.** <sup>1</sup>H NMR spectrum (CDCl<sub>3</sub>, 400 MHz) of compound 8.

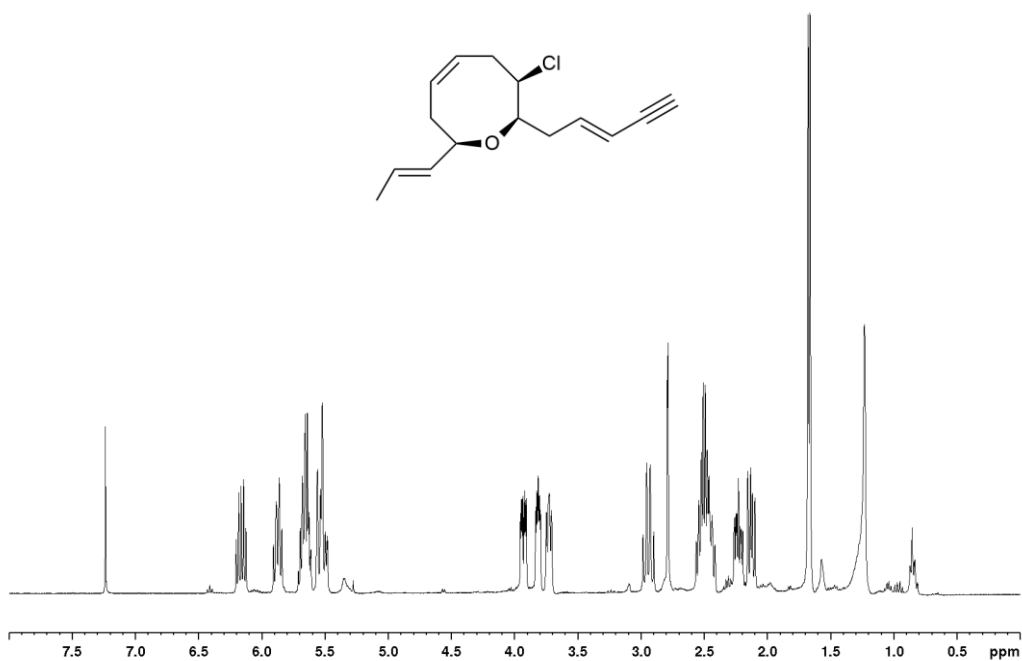

**Figure S26.** <sup>1</sup>H NMR spectrum (CDCl<sub>3</sub>, 400 MHz) of compound 9.

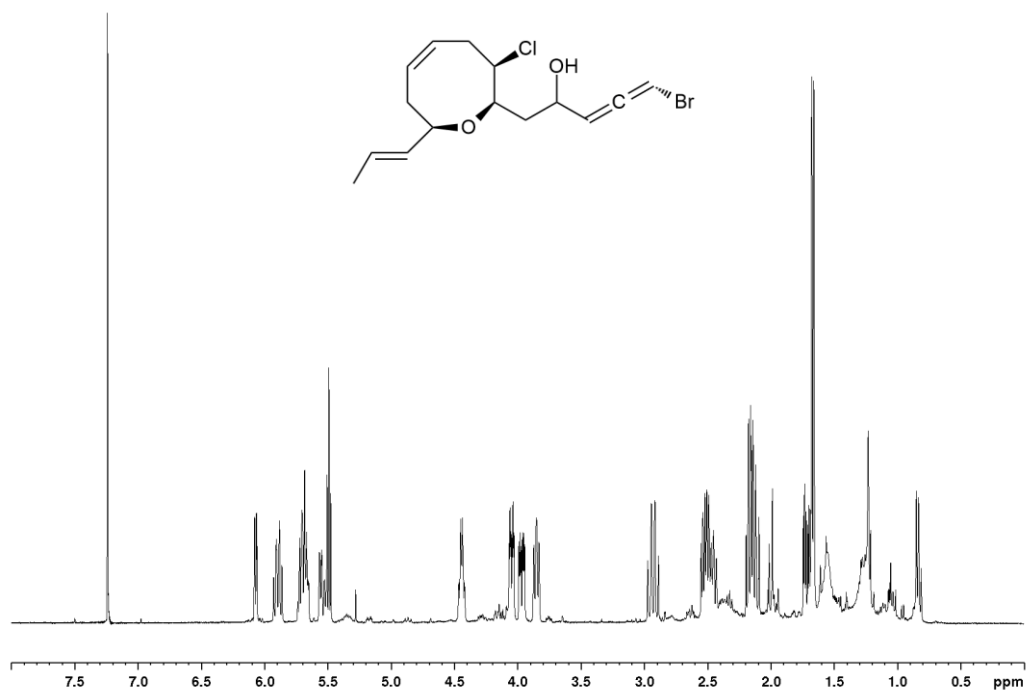

**Figure S27.** <sup>1</sup>H NMR spectrum (CDCl<sub>3</sub>, 400 MHz) of compound 10.

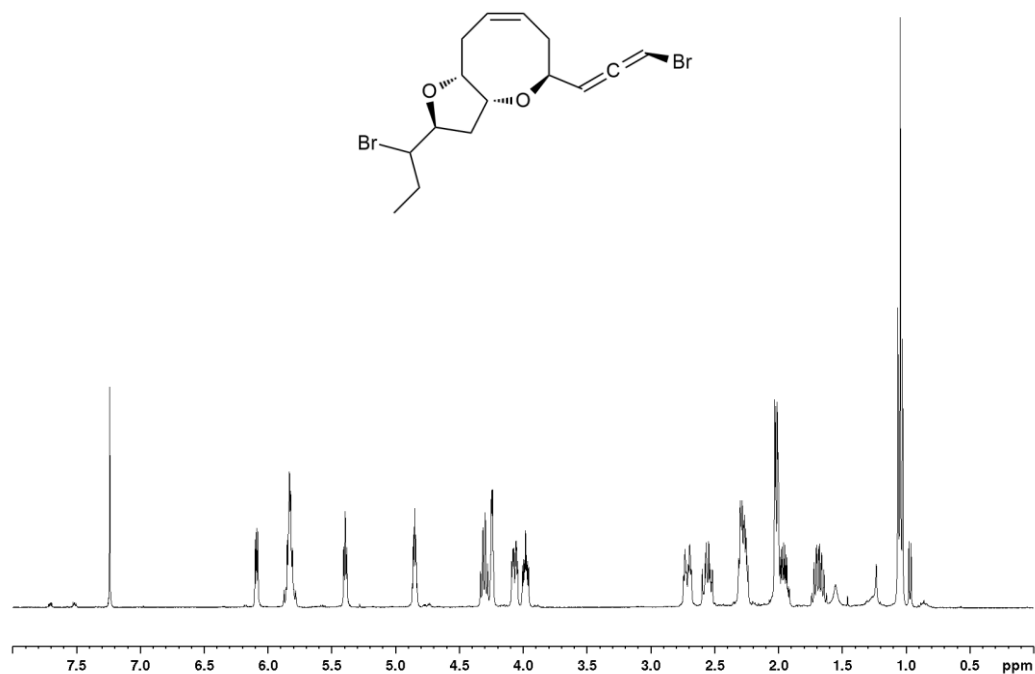

**Figure S28.** <sup>1</sup>H NMR spectrum (CDCl<sub>3</sub>, 400 MHz) of compound 11.

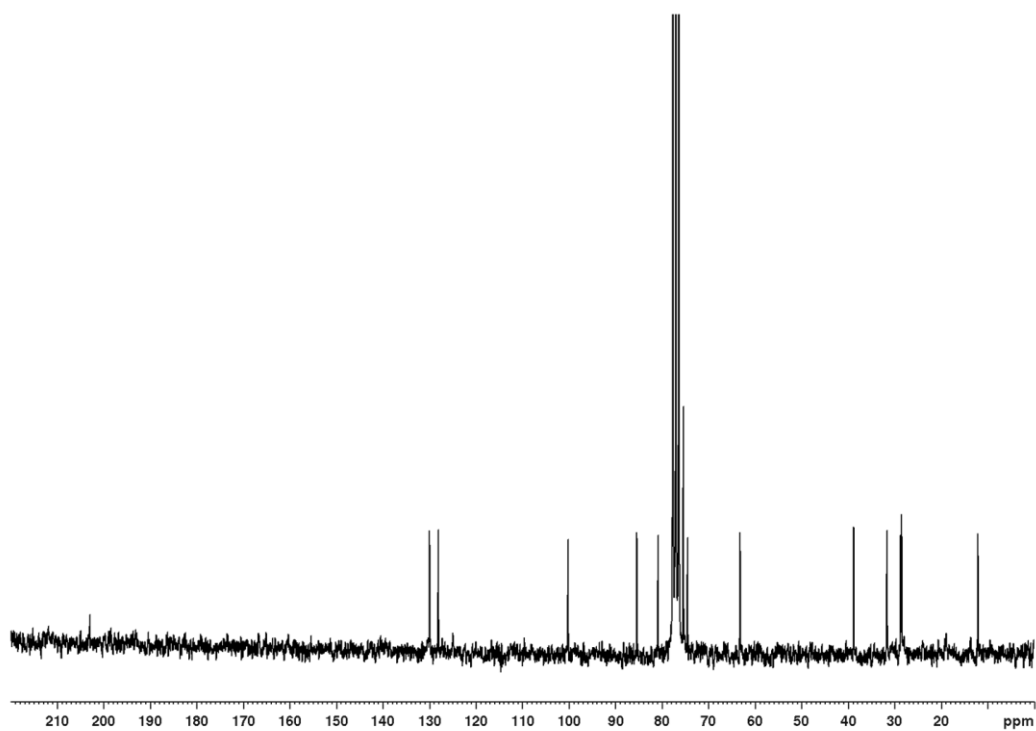

**Figure S29.**  $^{13}\text{C}$  NMR spectrum ( $\text{CDCl}_3$ , 50.3 MHz) of compound **11**.

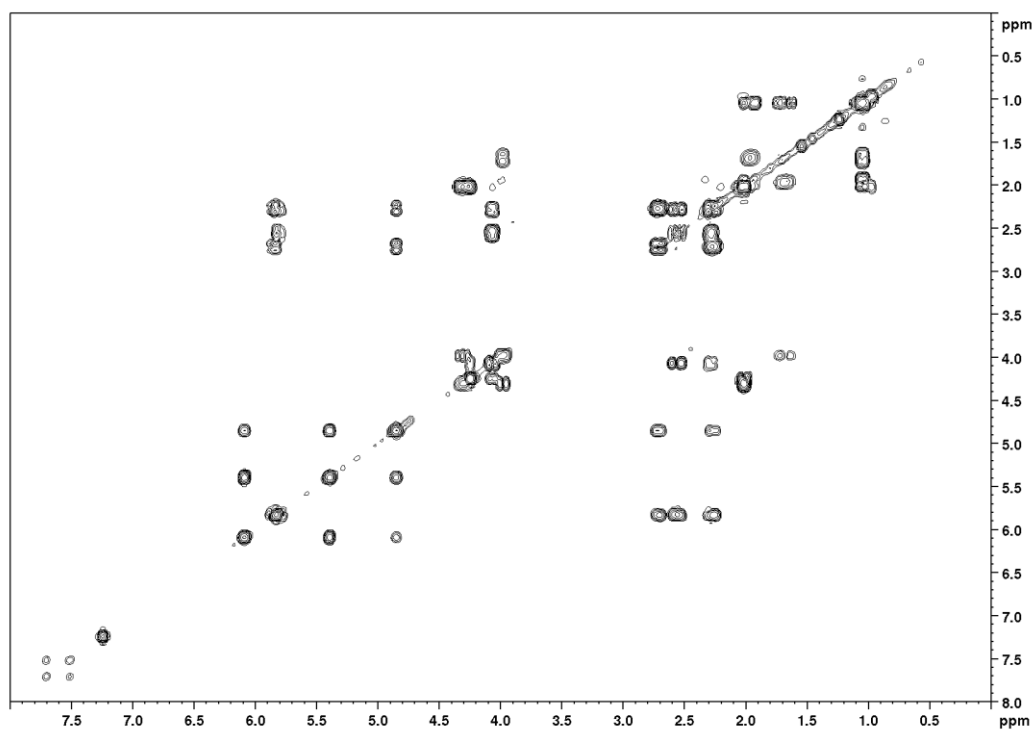

**Figure S30.** COSY spectrum ( $\text{CDCl}_3$ , 400 MHz) of compound **11**.

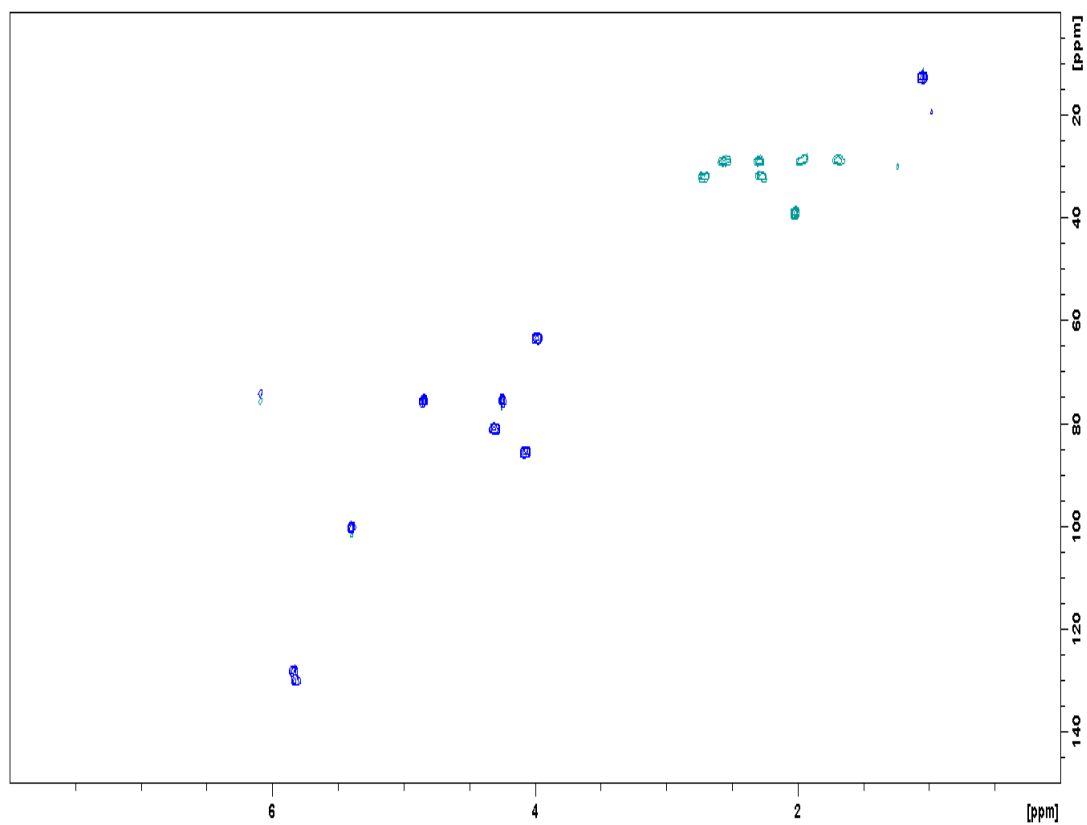

Figure S31. HSQC spectrum ( $\text{CDCl}_3$ , 400 MHz) of compound 11.

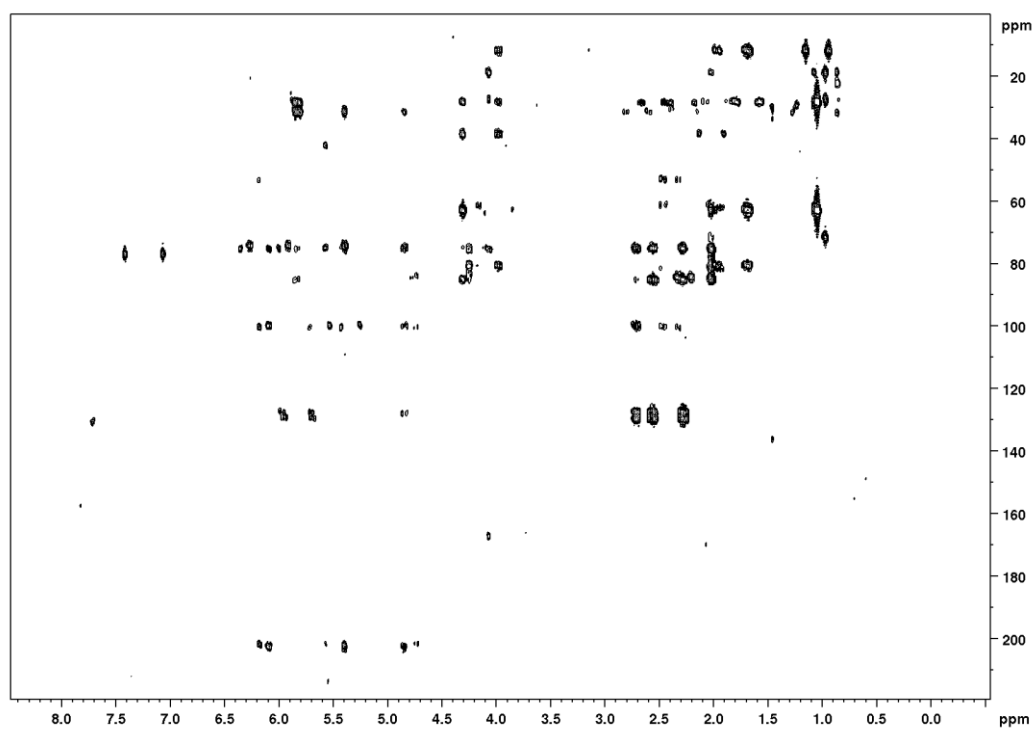

Figure S32. HMBC spectrum ( $\text{CDCl}_3$ , 600 MHz) of compound 11.

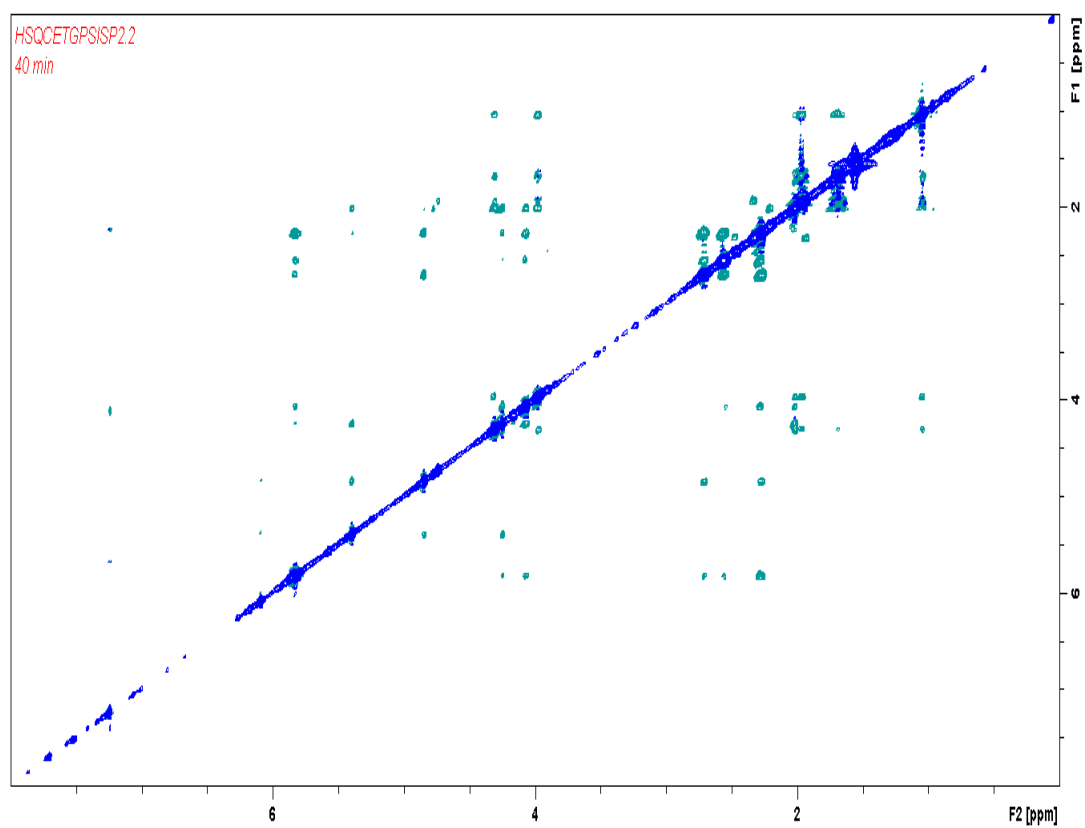

**Figure S33.** NOESY spectrum ( $\text{CDCl}_3$ , 600 MHz) of compound **11**.

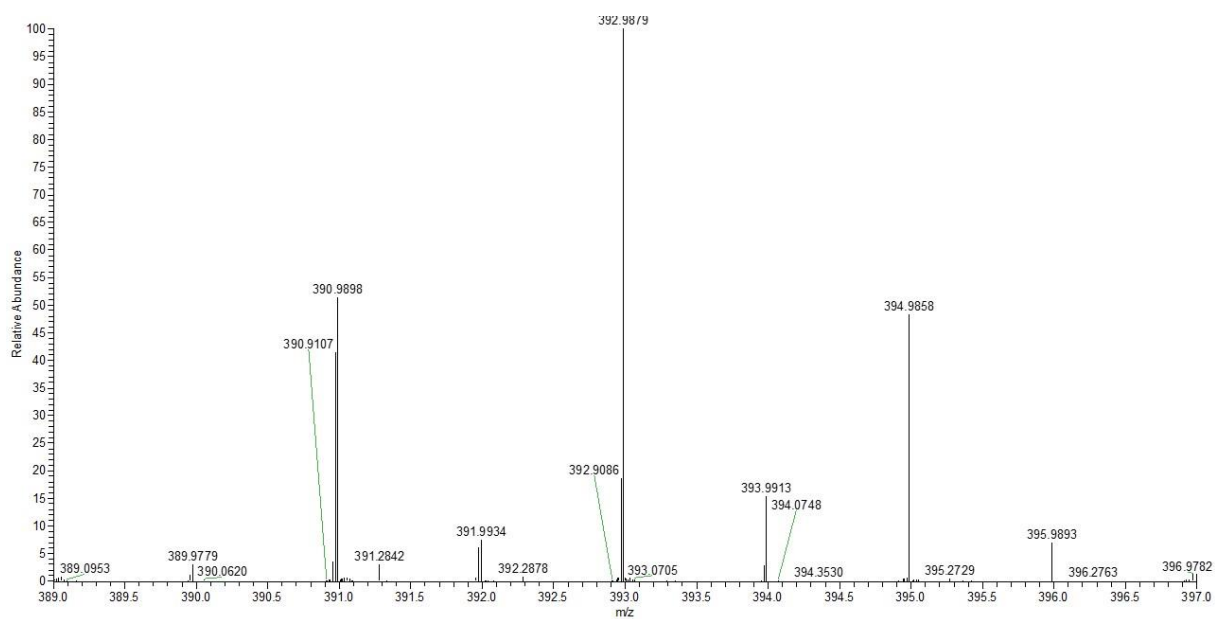

**Figure S34.** HR-APCIMS of compound **11**.

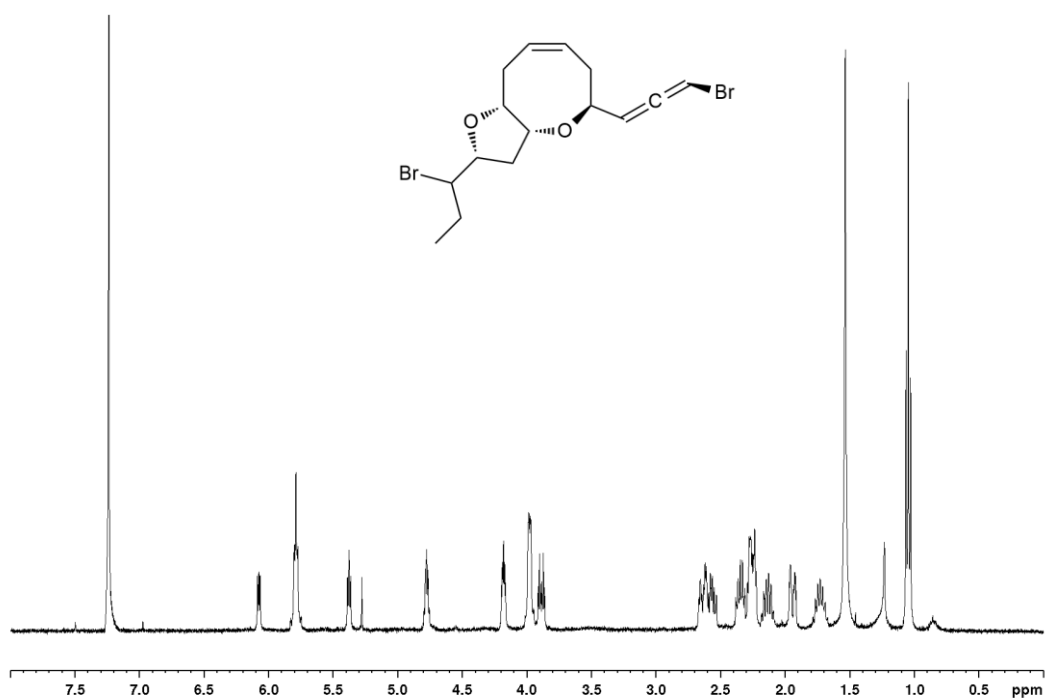

**Figure S35.** <sup>1</sup>H NMR spectrum (CDCl<sub>3</sub>, 400 MHz) of compound 12.

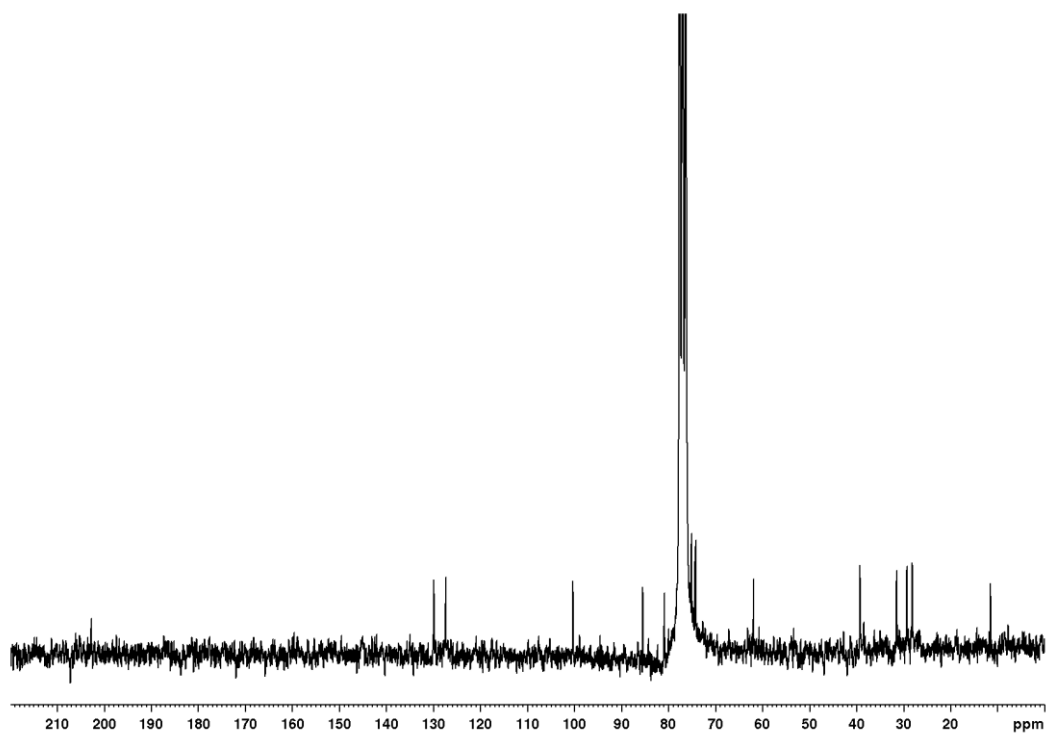

**Figure S36.** <sup>13</sup>C NMR spectrum (CDCl<sub>3</sub>, 50.3 MHz) of compound 12.

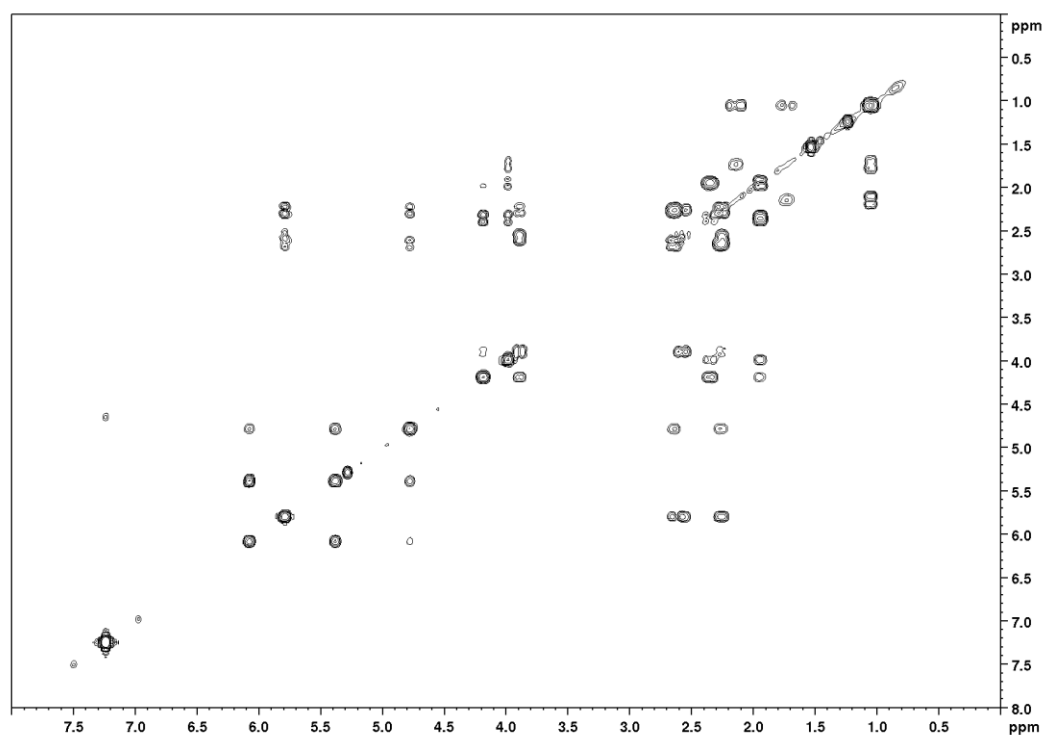

Figure S37. COSY spectrum ( $\text{CDCl}_3$ , 400 MHz) of compound **12**.

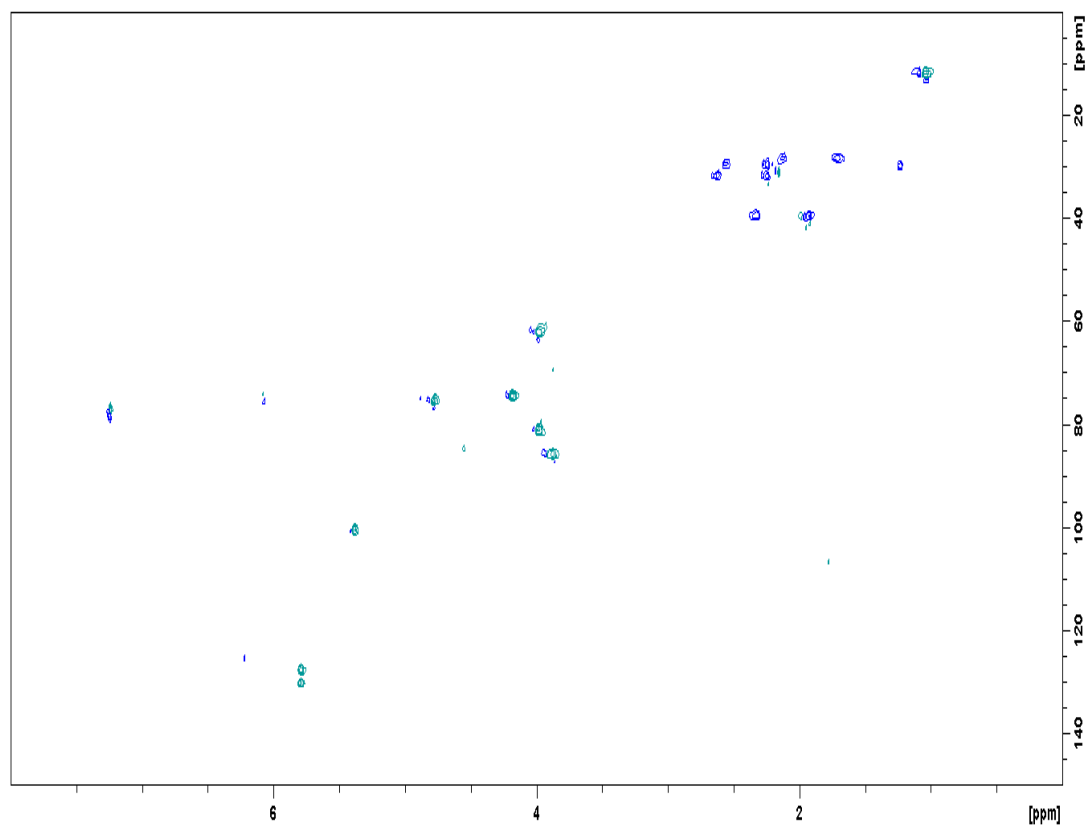

Figure S38. HSQC spectrum ( $\text{CDCl}_3$ , 400 MHz) of compound **12**.

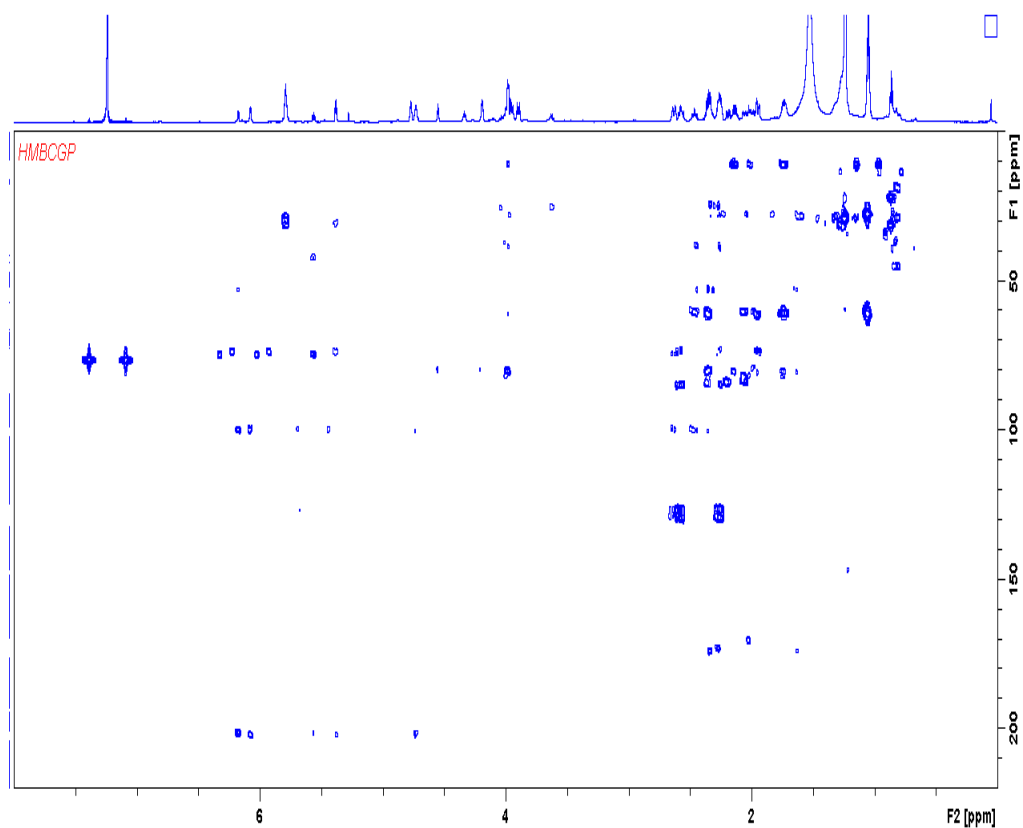

**Figure S39.** HMBC spectrum ( $\text{CDCl}_3$ , 700 MHz) of compound **12** (partial decomposition was already observed).

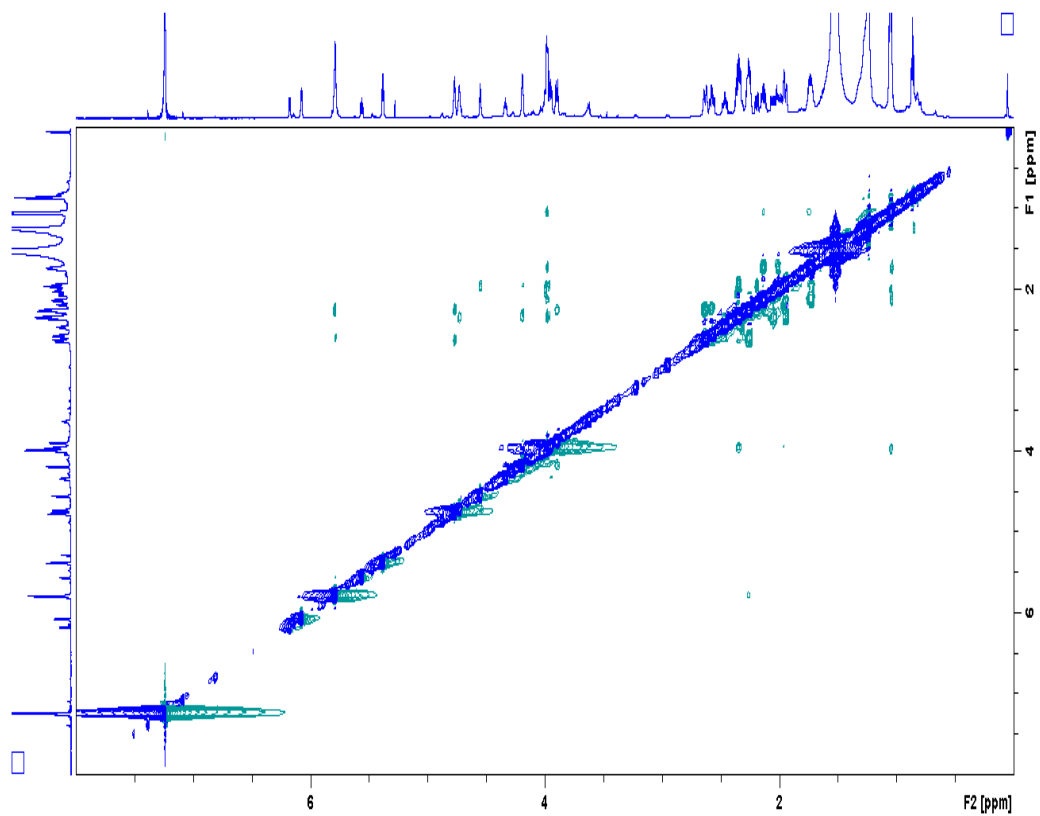

**Figure S40.** NOESY spectrum ( $\text{CDCl}_3$ , 700 MHz) of compound **12** (partial decomposition was already observed).



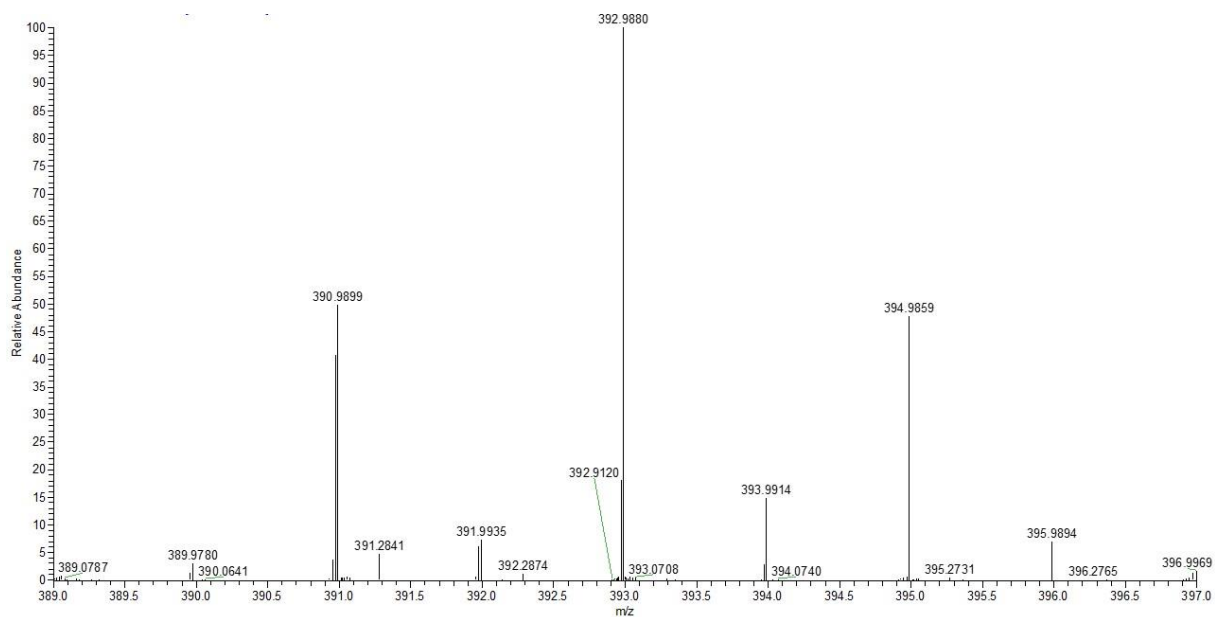

**Figure S41.** HR-APCIMS of compound **12**.

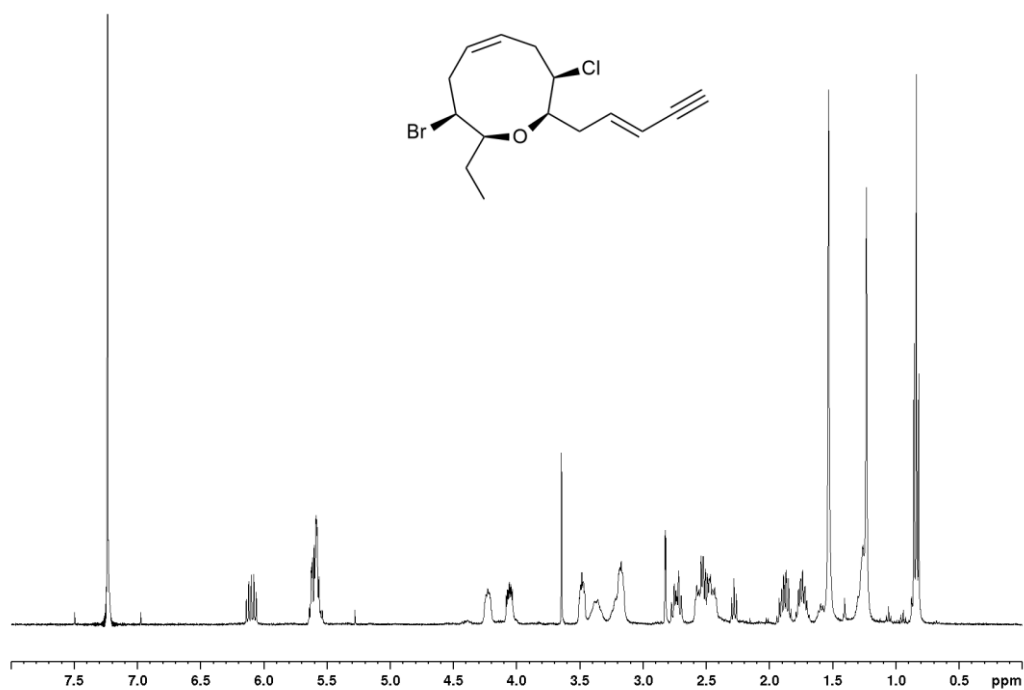

**Figure S42.** <sup>1</sup>H NMR spectrum (CDCl<sub>3</sub>, 400 MHz) of compound **13**.

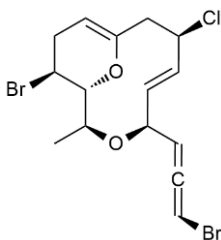

**Figure S43.**  $^1\text{H}$  NMR spectrum ( $\text{CDCl}_3$ , 400 MHz) of compound **14**.

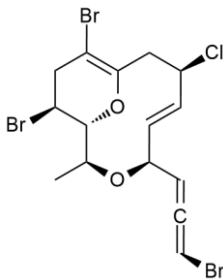

**Figure S44.**  $^1\text{H}$  NMR spectrum ( $\text{CDCl}_3$ , 400 MHz) of compound **15**.

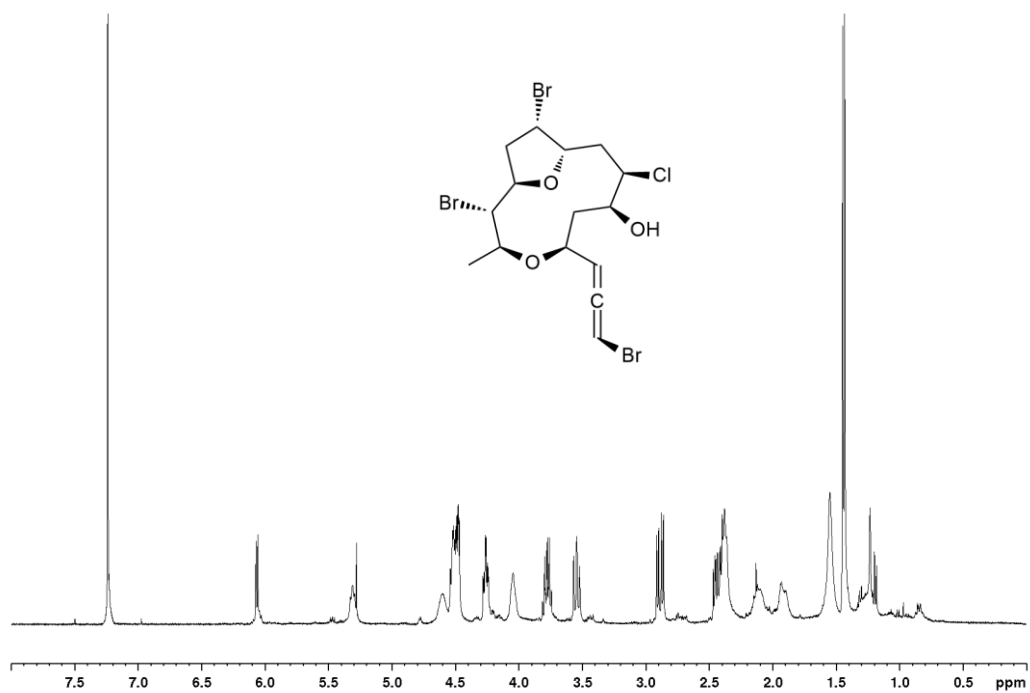

**Figure S45.** <sup>1</sup>H NMR spectrum (CDCl<sub>3</sub>, 400 MHz) of compound 16.

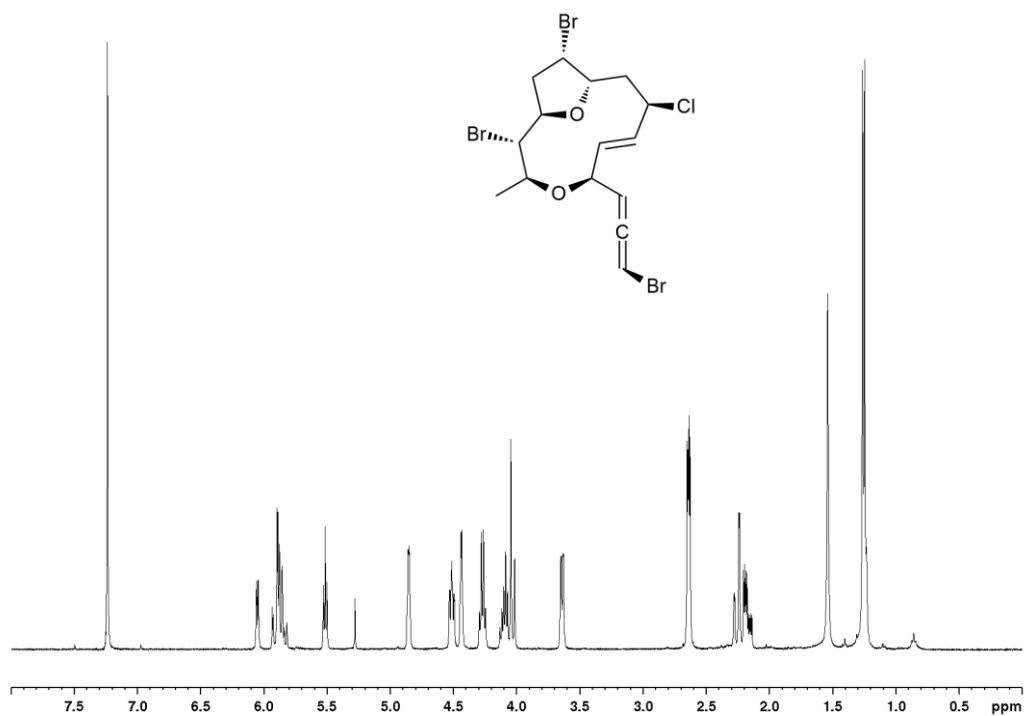

**Figure S46.** <sup>1</sup>H NMR spectrum (CDCl<sub>3</sub>, 400 MHz) of compound 17.

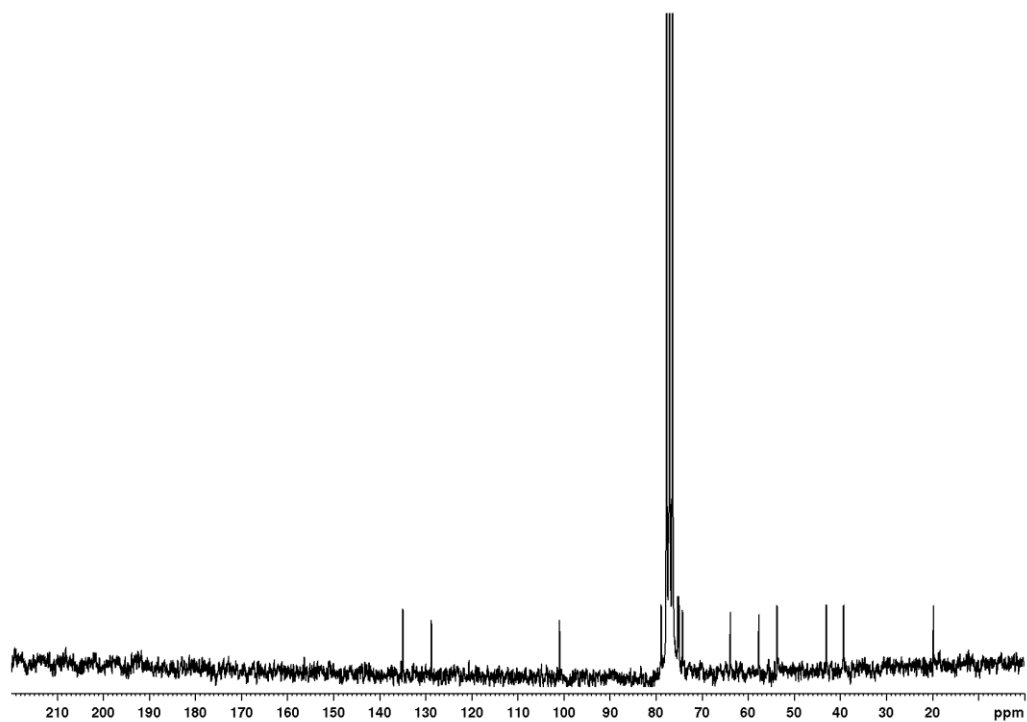

Figure S47.  $^{13}\text{C}$  NMR spectrum ( $\text{CDCl}_3$ , 50.3 MHz) of compound 17.

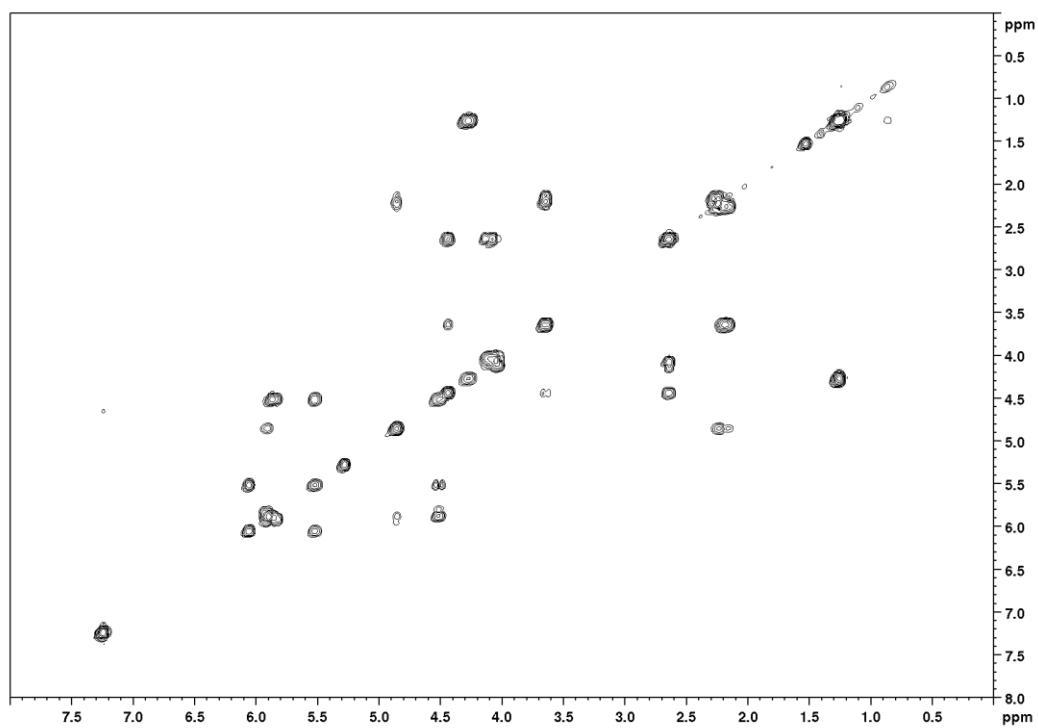

Figure S48. COSY spectrum ( $\text{CDCl}_3$ , 400 MHz) of compound 17.

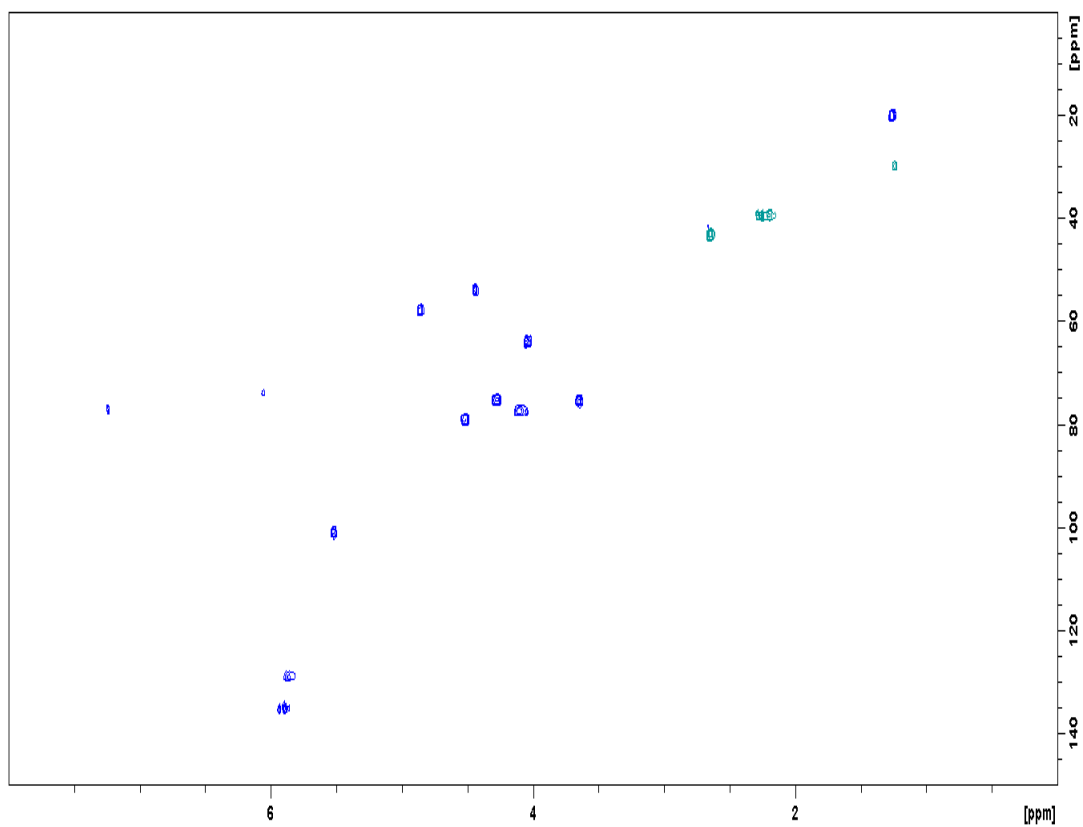

**Figure S49.** HSQC spectrum ( $\text{CDCl}_3$ , 400 MHz) of compound 17.

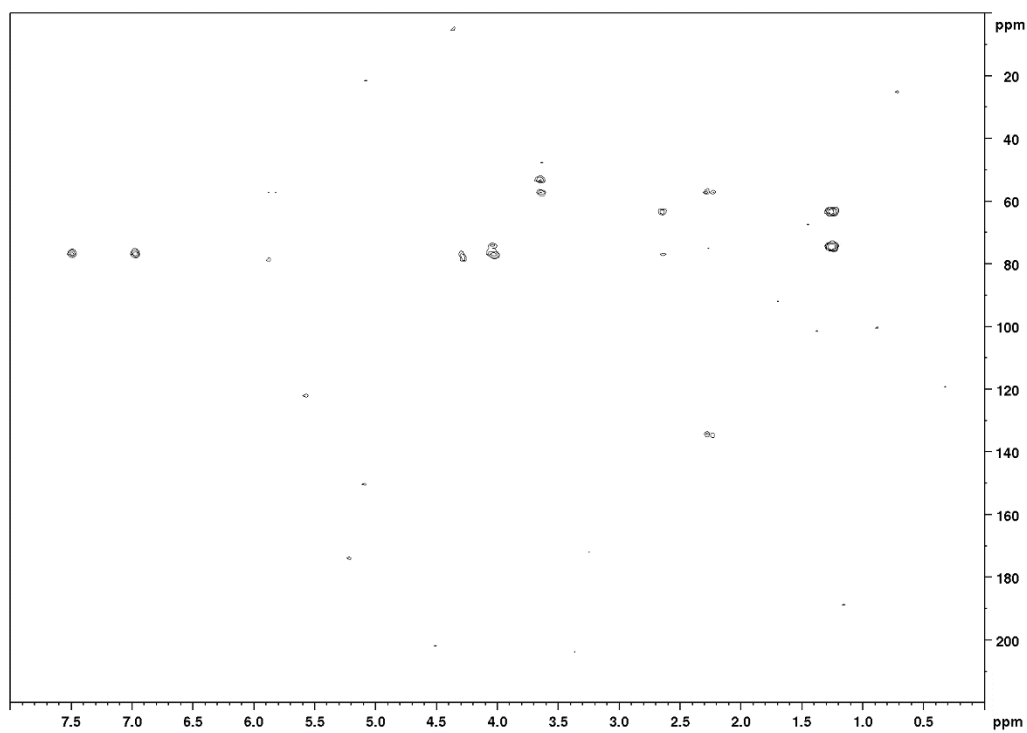

**Figure S50.** HMBC spectrum ( $\text{CDCl}_3$ , 400 MHz) of compound 17.

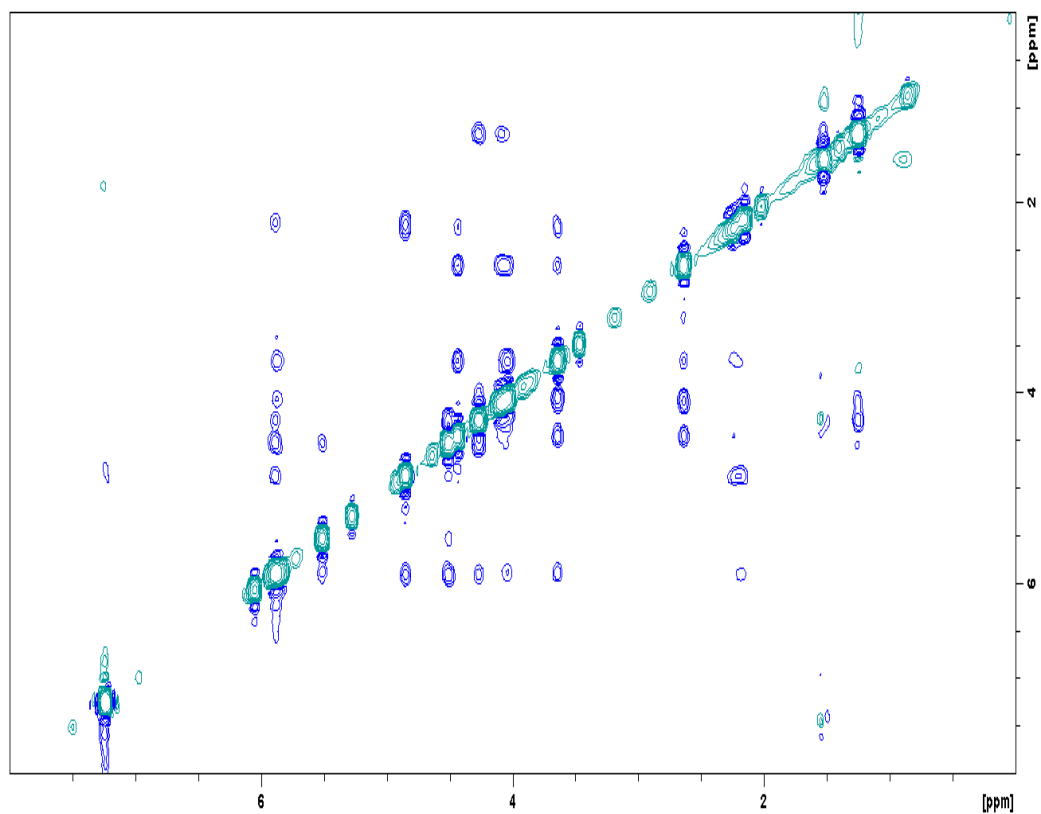

**Figure S51.** NOESY spectrum ( $\text{CDCl}_3$ , 400 MHz) of compound **17**.

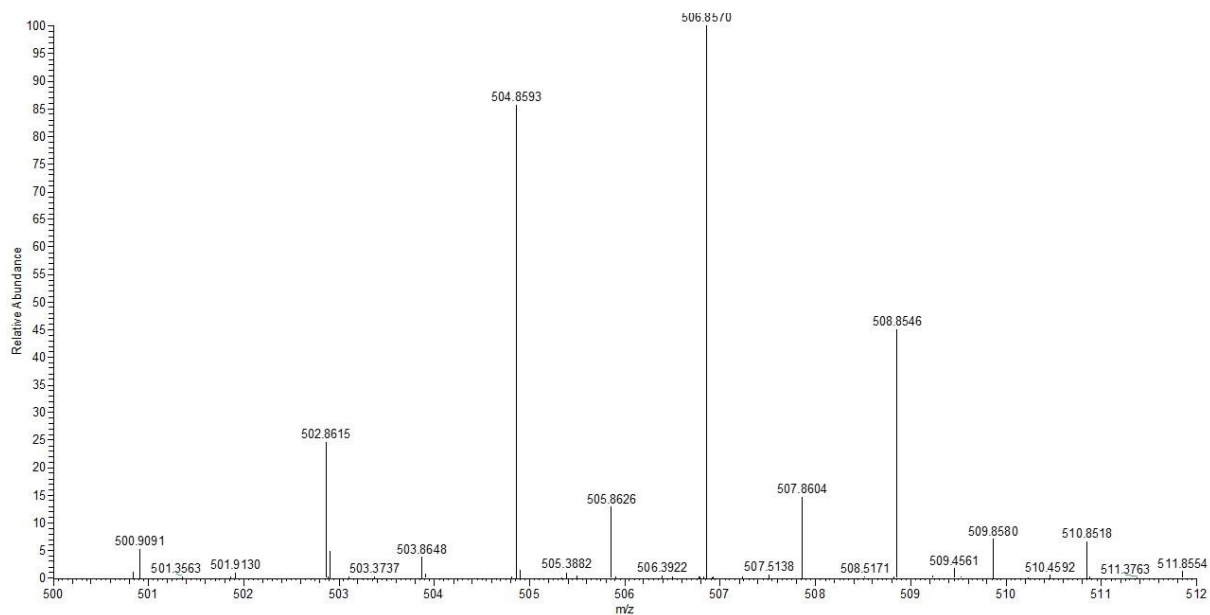

**Figure S52.** HR-APCIMS of compound **17**.

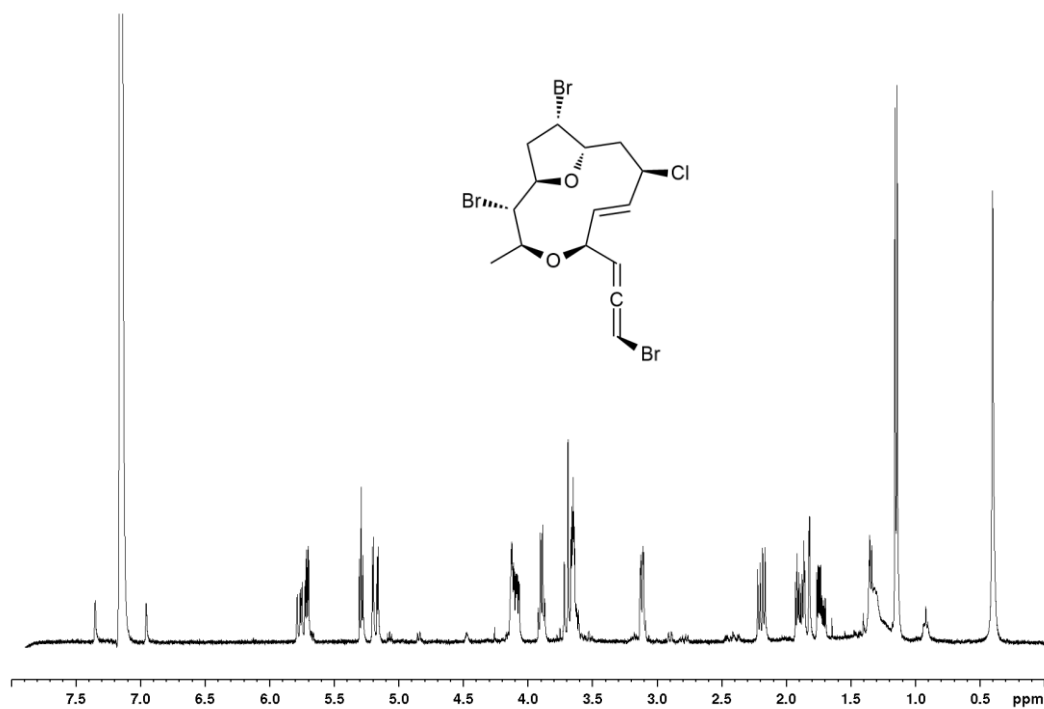

Figure S53. <sup>1</sup>H NMR spectrum (CDCl<sub>3</sub>, 400 MHz) of compound 17.

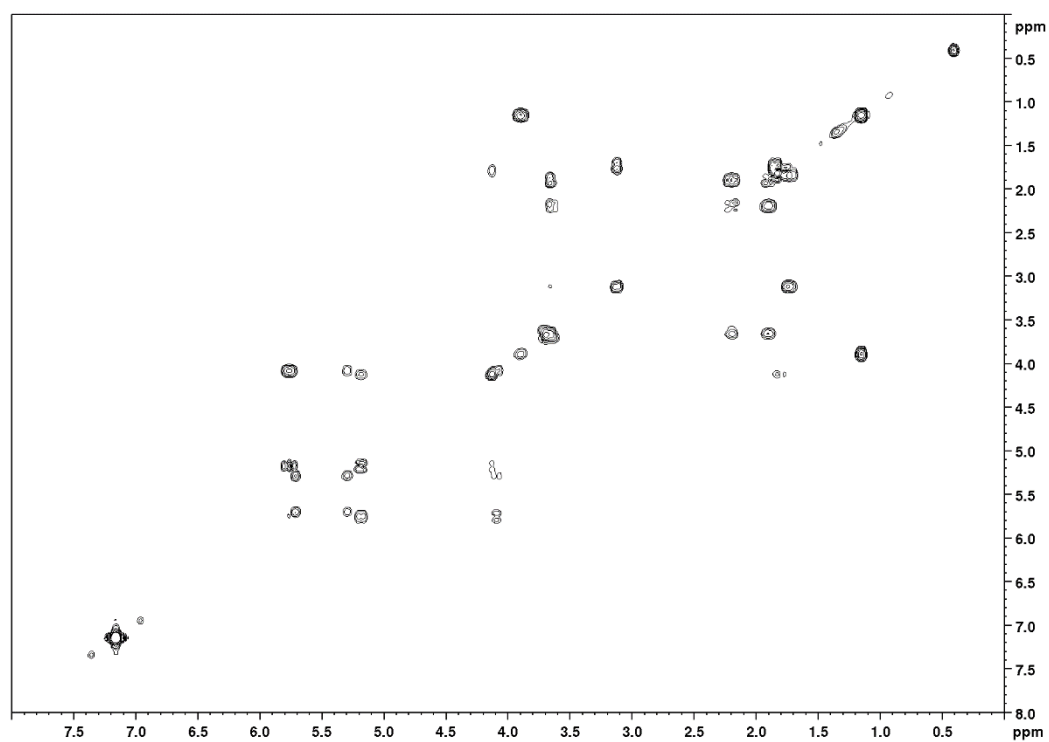

Figure S54. COSY spectrum (CDCl<sub>3</sub>, 400 MHz) of compound 17.

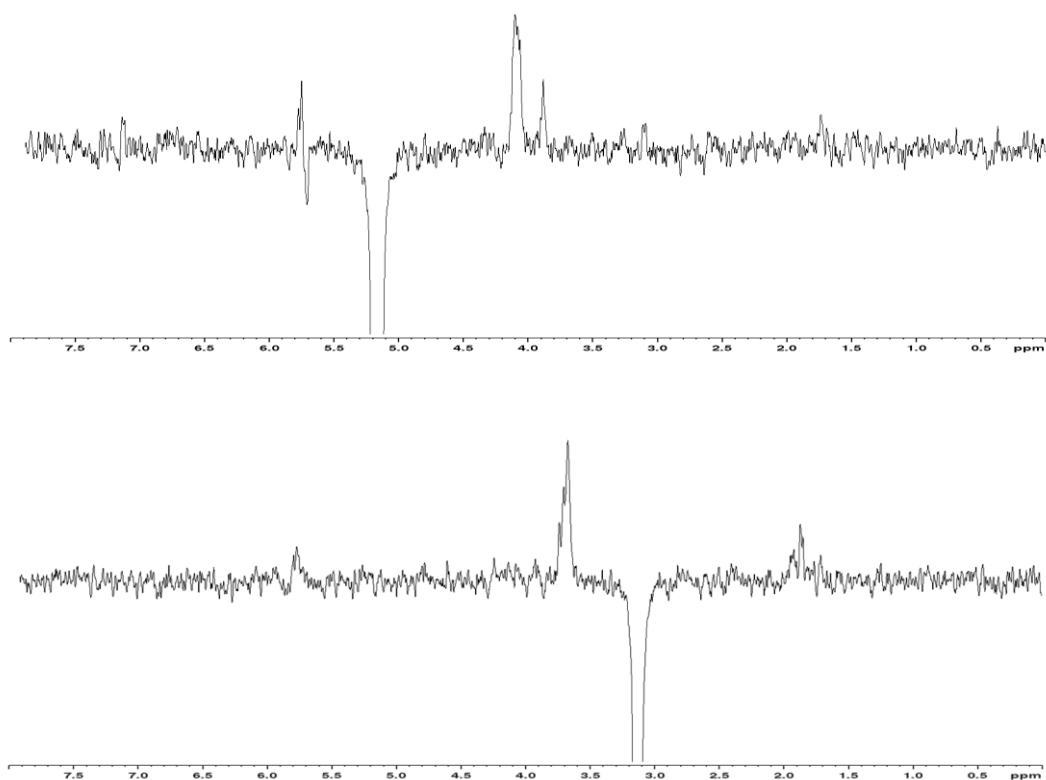

**Figure S55.** 1D-NOE spectra ( $\text{C}_6\text{D}_6$ , 400 MHz) of compound **17**.

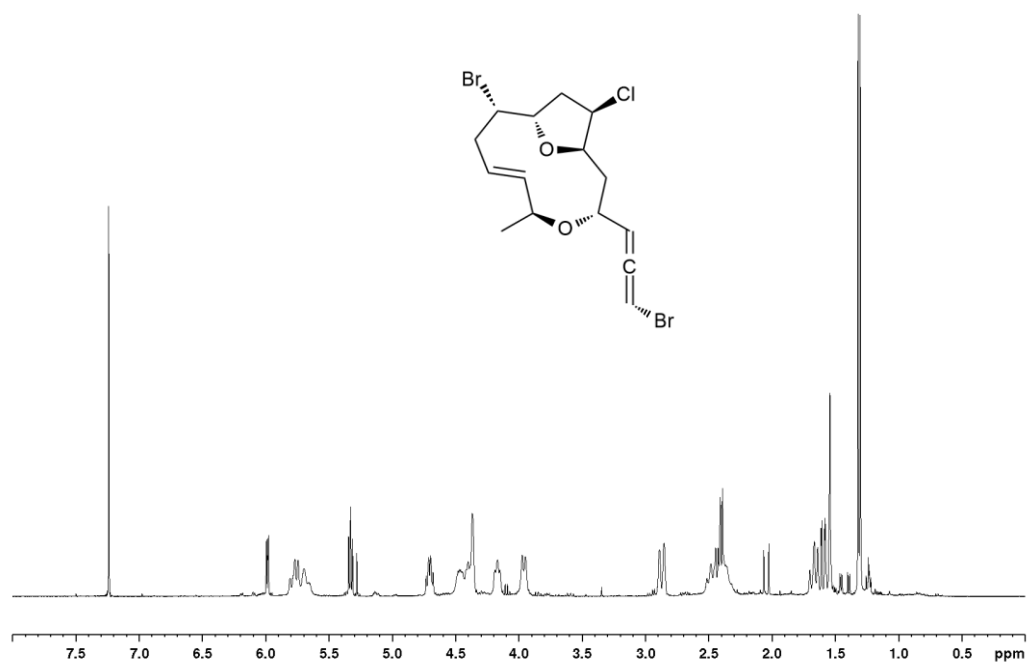

**Figure S56.**  $^1\text{H}$  NMR spectrum ( $\text{CDCl}_3$ , 400 MHz) of compound **18**.



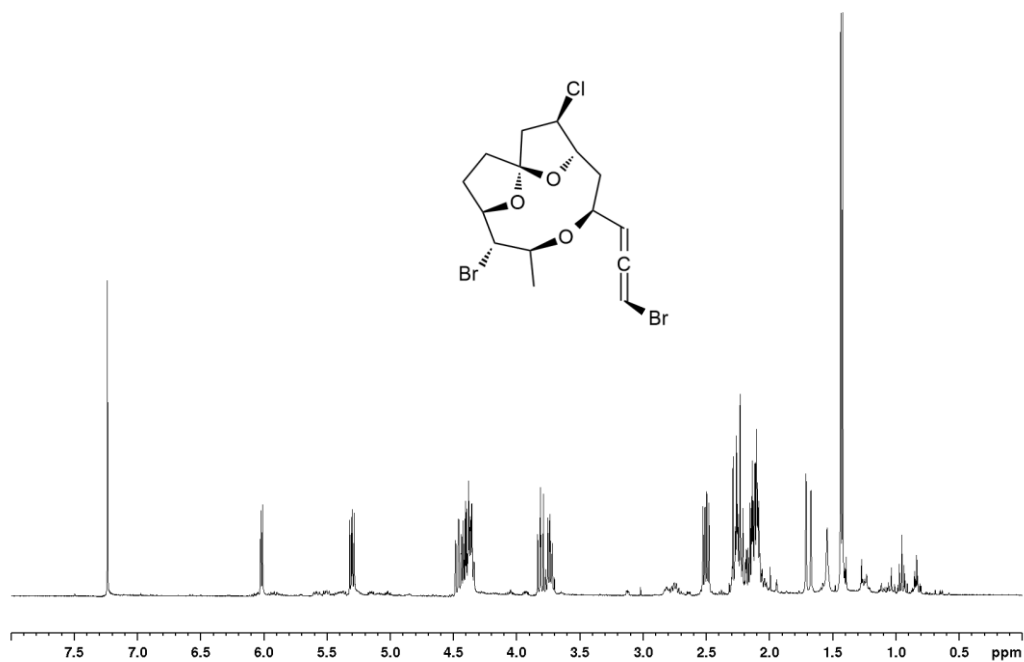

**Figure S57.**  $^1\text{H}$  NMR spectrum ( $\text{CDCl}_3$ , 400 MHz) of compound **19**.

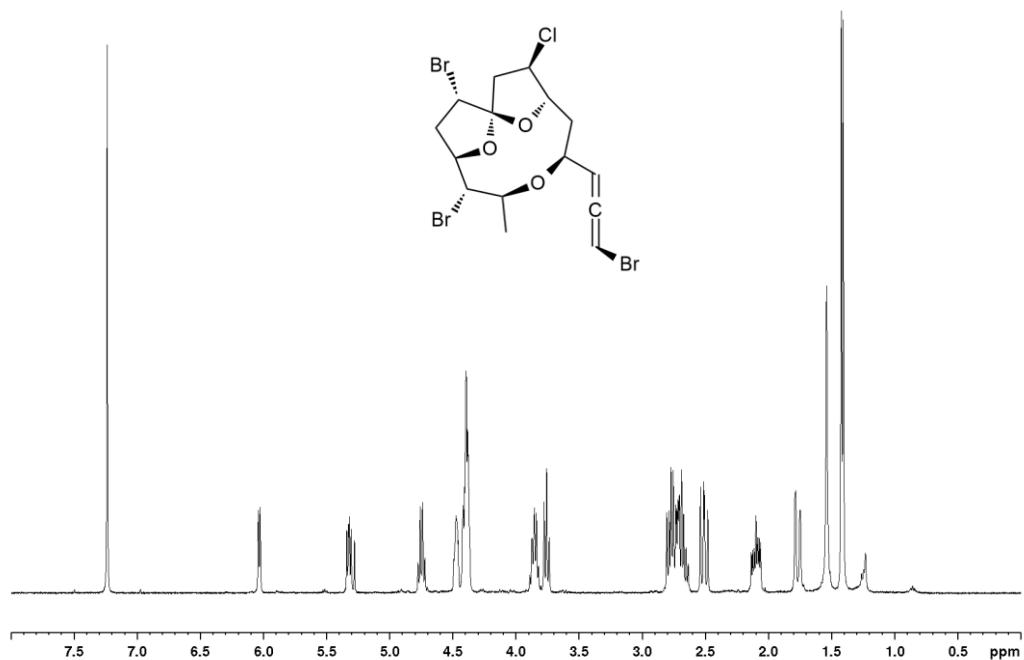

**Figure S58.**  $^1\text{H}$  NMR spectrum ( $\text{CDCl}_3$ , 400 MHz) of compound **20**.

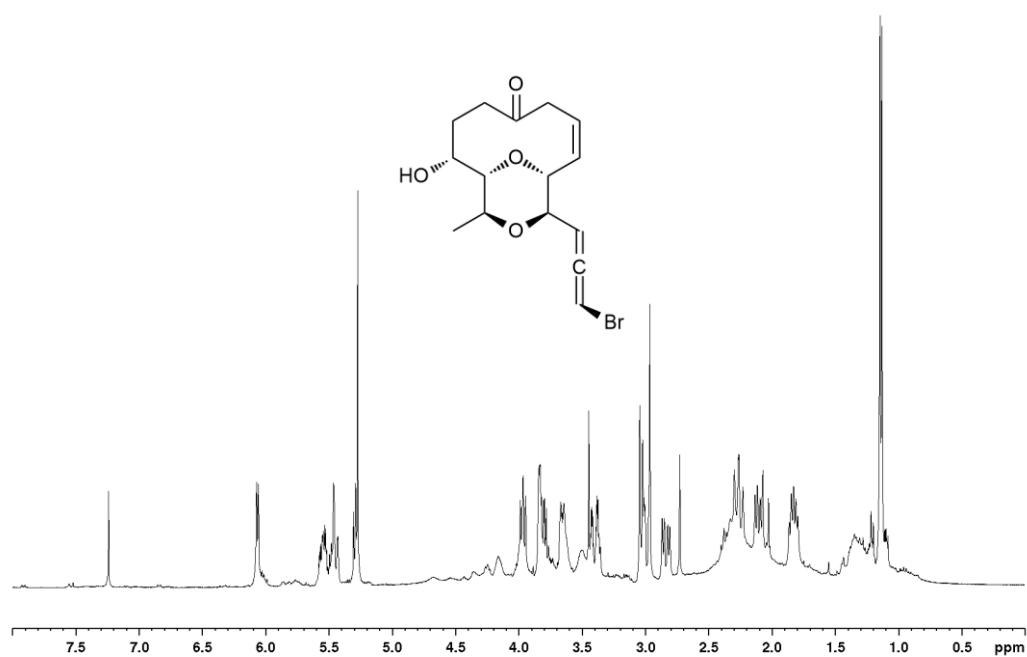

**Figure S59.** <sup>1</sup>H NMR spectrum (CDCl<sub>3</sub>, 400 MHz) of compound 21.

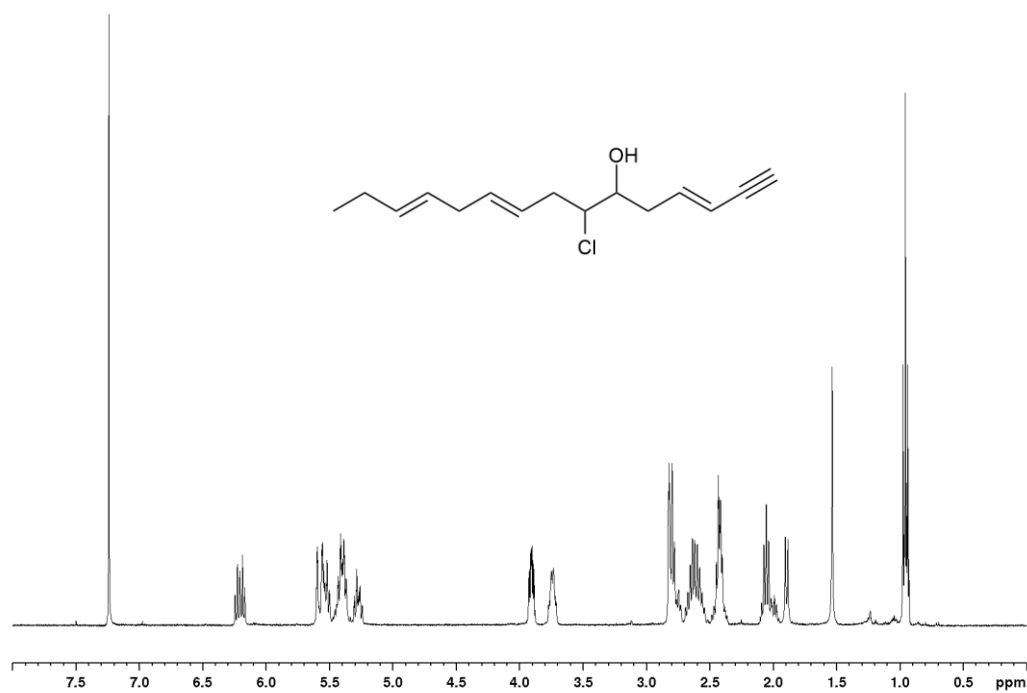

**Figure S60.** <sup>1</sup>H NMR spectrum (CDCl<sub>3</sub>, 400 MHz) of compound 22.

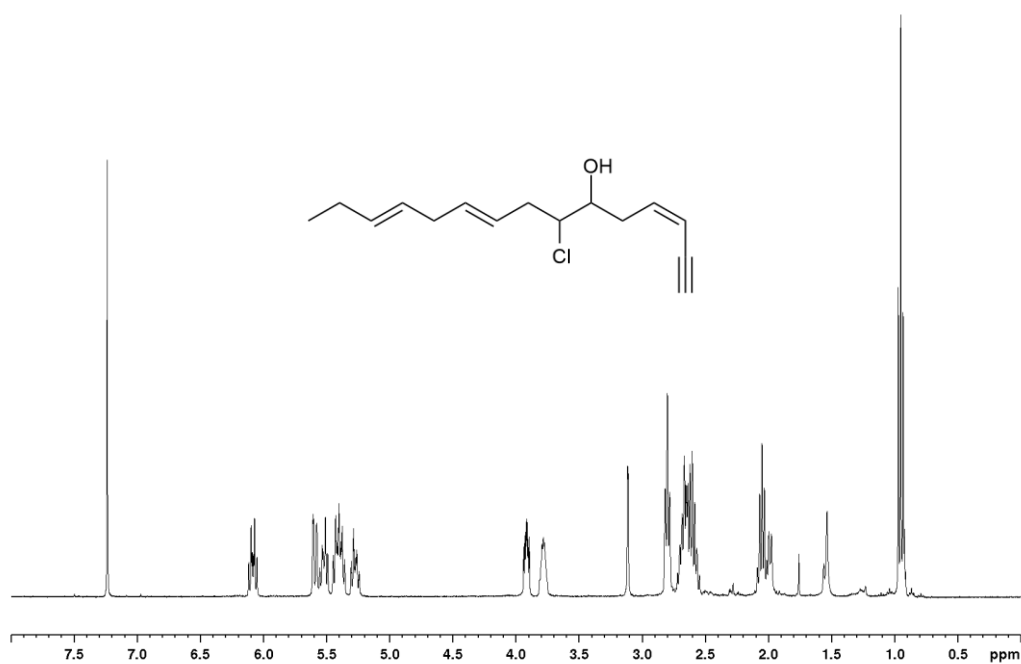

**Figure S61.** <sup>1</sup>H NMR spectrum (CDCl<sub>3</sub>, 400 MHz) of compound **23**.

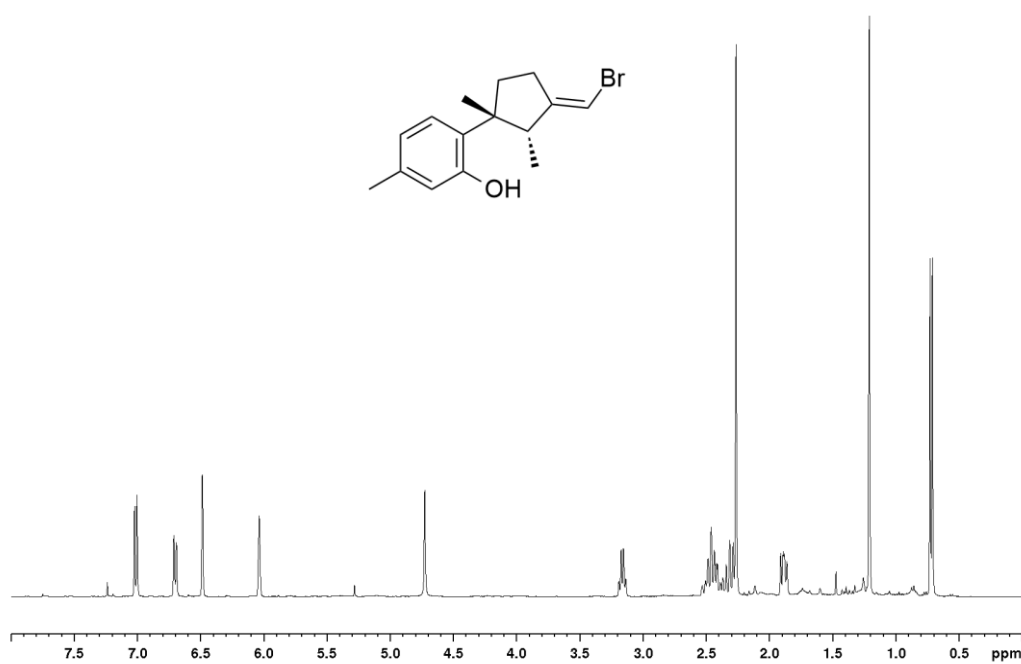

**Figure S62.** <sup>1</sup>H NMR spectrum (CDCl<sub>3</sub>, 400 MHz) of compound **24**.

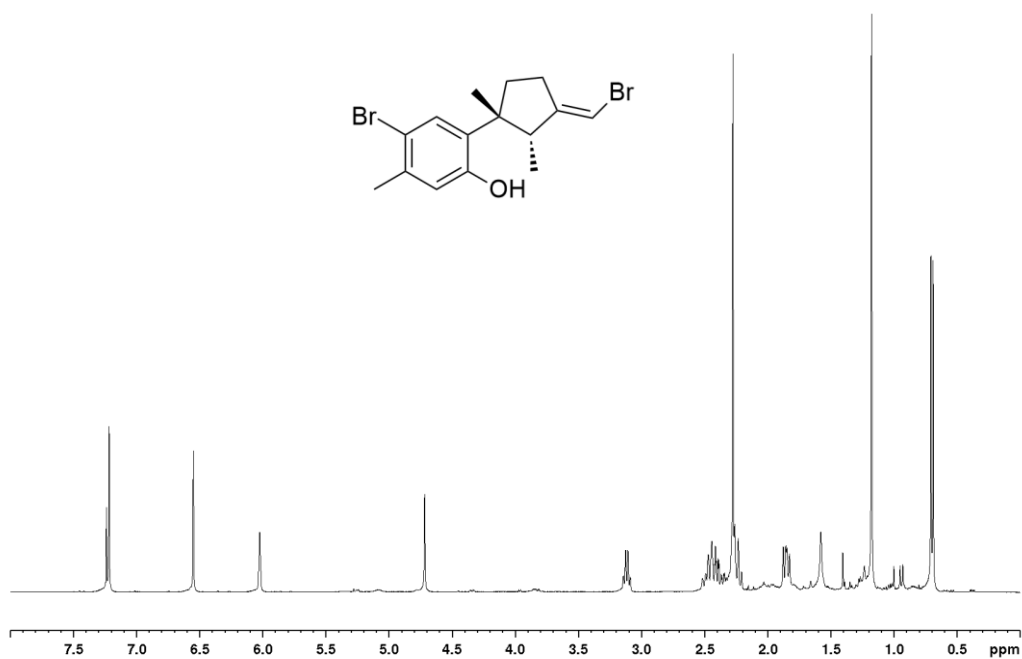

**Figure S63.** <sup>1</sup>H NMR spectrum (CDCl<sub>3</sub>, 400 MHz) of compound 25.

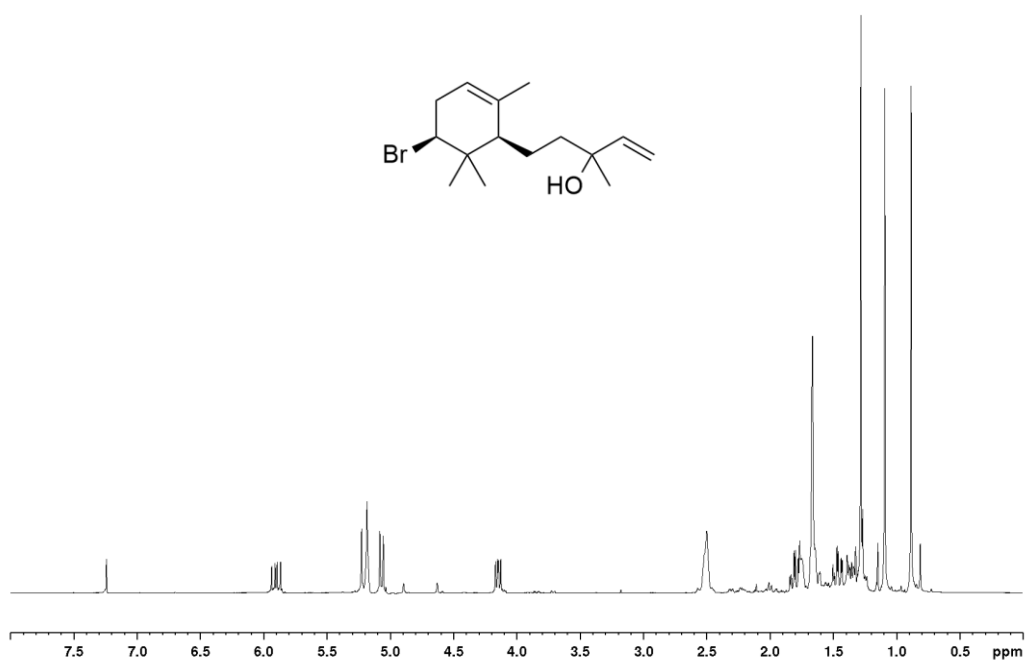

**Figure S64.** <sup>1</sup>H NMR spectrum (CDCl<sub>3</sub>, 400 MHz) of compound 26.

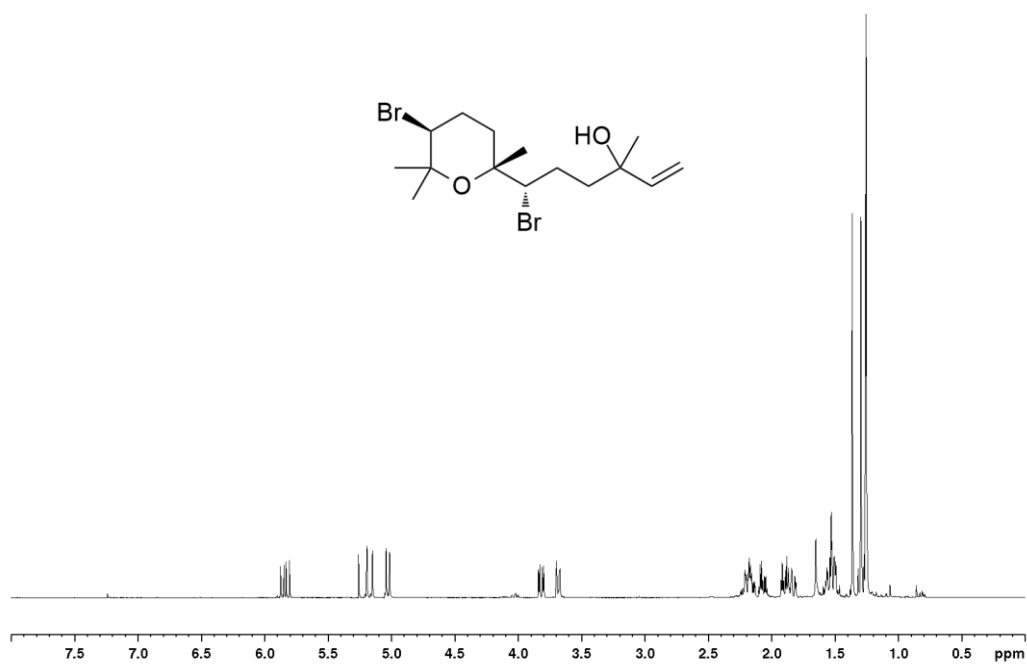

**Figure S65.**  $^1\text{H}$  NMR spectrum ( $\text{CDCl}_3$ , 400 MHz) of compound **27**.

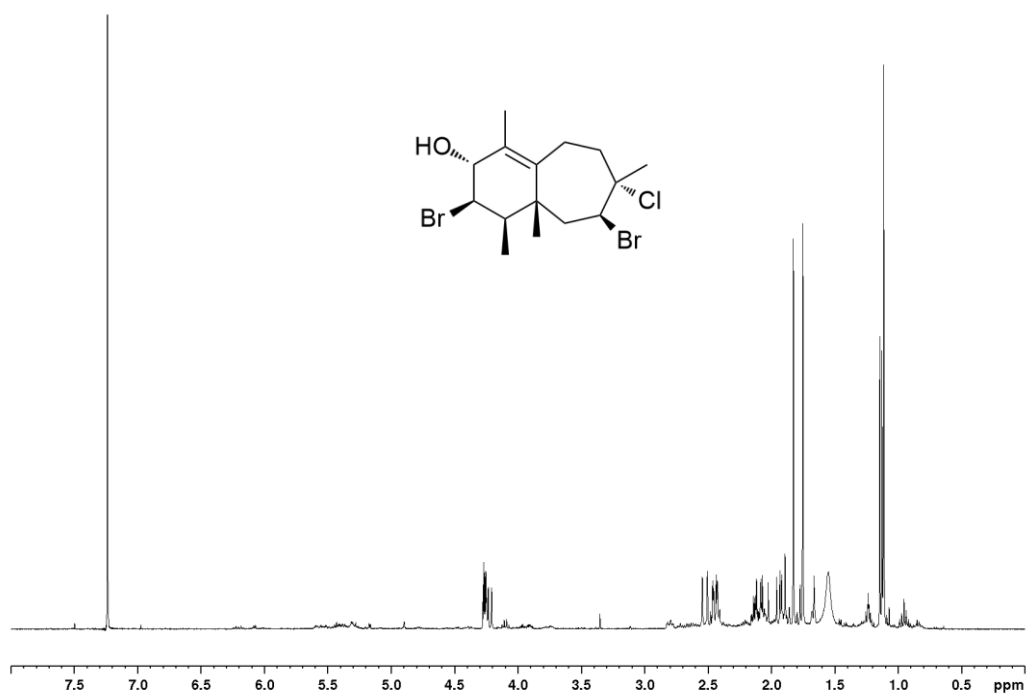

**Figure S66.**  $^1\text{H}$  NMR spectrum ( $\text{CDCl}_3$ , 400 MHz) of compound **28**.

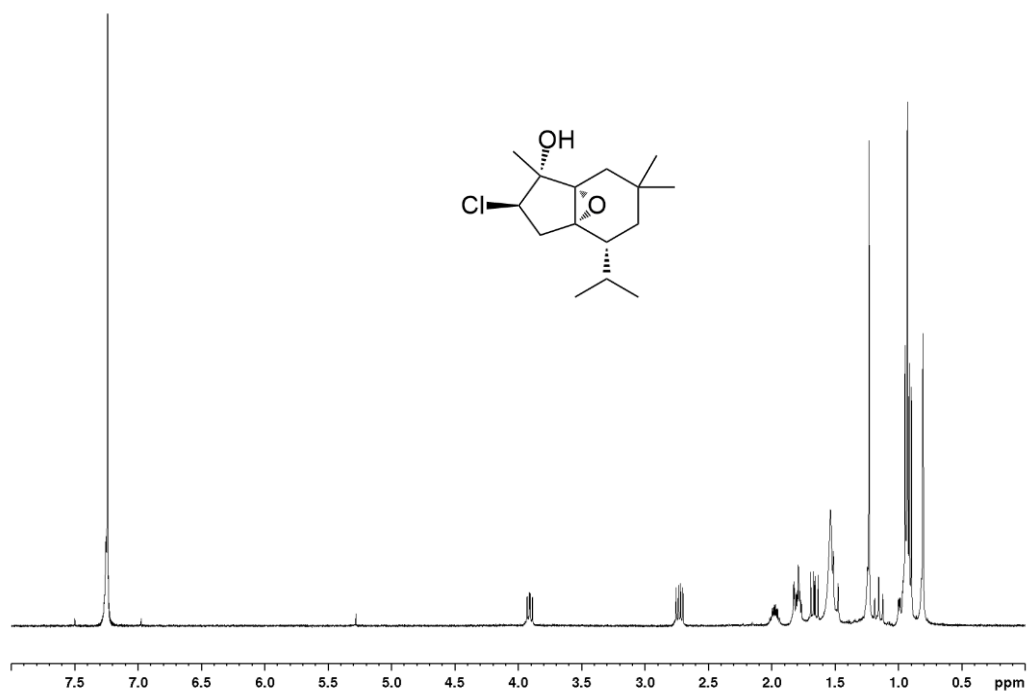

**Figure S67.** <sup>1</sup>H NMR spectrum (CDCl<sub>3</sub>, 400 MHz) of compound 29.

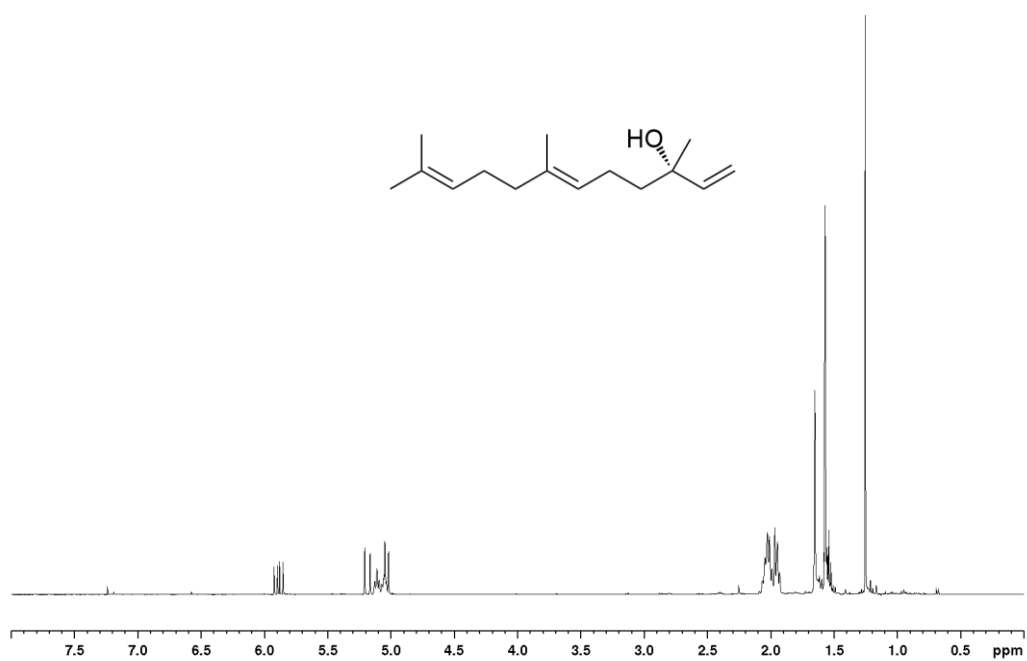

**Figure S68.** <sup>1</sup>H NMR spectrum (CDCl<sub>3</sub>, 400 MHz) of compound 30.

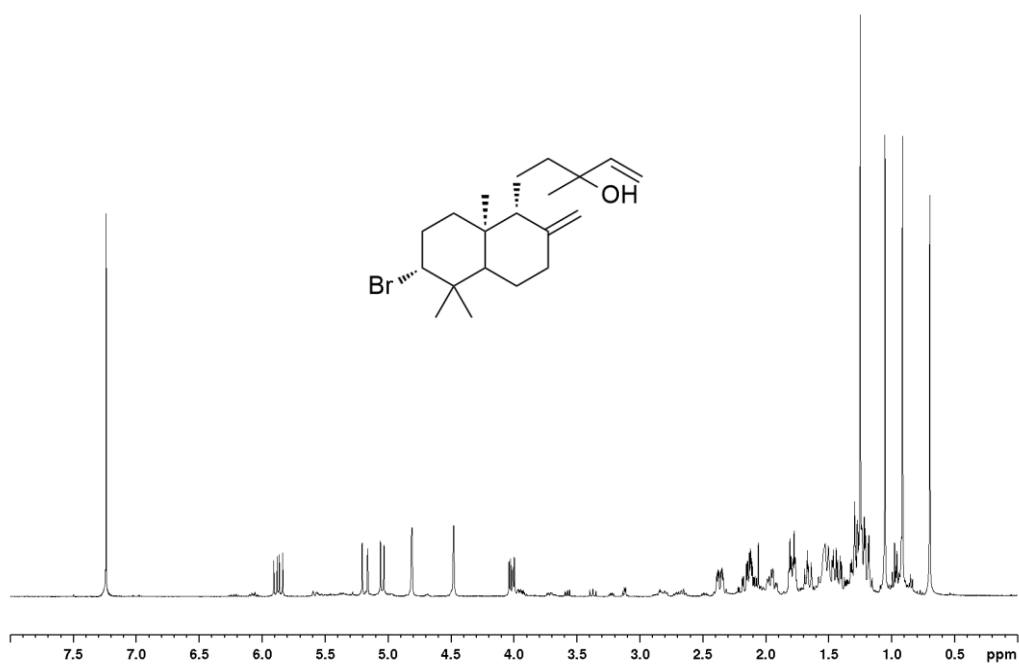

**Figure S69.** <sup>1</sup>H NMR spectrum (CDCl<sub>3</sub>, 400 MHz) of compound 31.

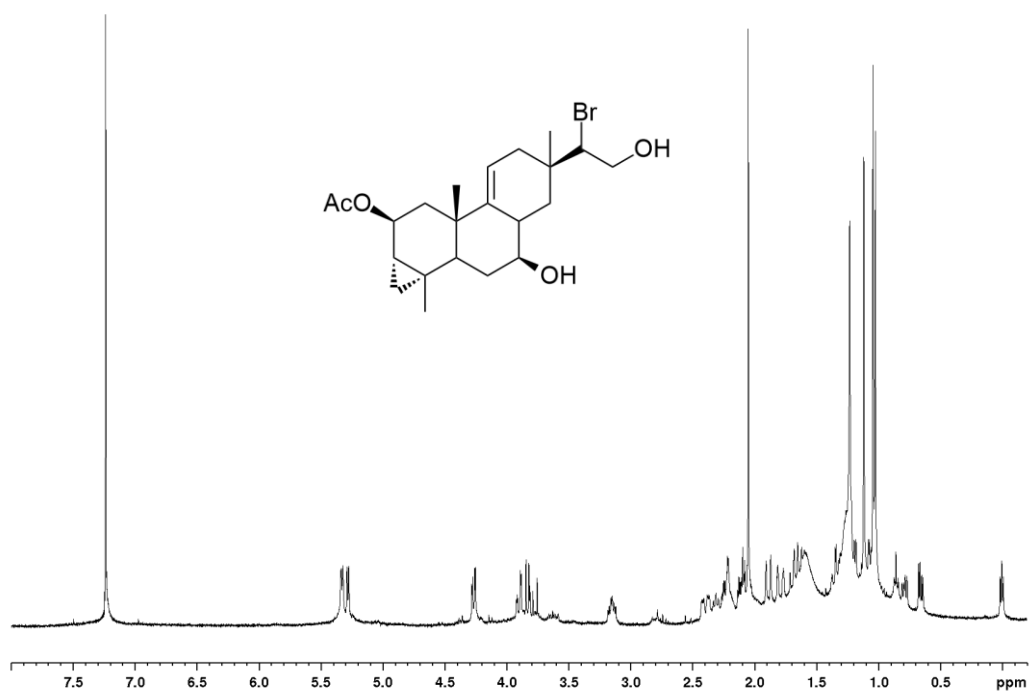

**Figure S70.** <sup>1</sup>H NMR spectrum (CDCl<sub>3</sub>, 400 MHz) of compound 32.
